# Supplementary material for: Synthesis and Structural Elucidation of P-stereogenic Coumarins
Source: MDPI journal article supplement (doi:10.3390/sym16010073), 2024-01-05
Supplement: s1 [file s1]

# Synthesis and Structural Elucidation of *P*-stereogenic Coumarins

Kamil F. Dziuba, Sławomir Frynas, Anna E. Koziół and Katarzyna Szwaczko \*

Department of Organic Chemistry and Crystallochemistry, Institute of Chemical Sciences,  
Faculty of Chemistry, Marie Curie-Skłodowska University in Lublin, 33 Gliniana St., 20-614  
Lublin, Poland; kamil.dziuba@mail.umcs.pl (K.F.D.); slawomir.frynas@mail.umcs.pl (S.F.);  
anna.kozioł@mail.umcs.pl (A.E.K.)

\* Correspondence: katarzyna.szwaczko@mail.umcs.pl

## Table of contents

|                                                                                                                                       |         |
|---------------------------------------------------------------------------------------------------------------------------------------|---------|
| 1. NMR spectra of compounds .....                                                                                                     | S2-S47  |
| 2. The single-crystal-diffraction data for <b>2d</b> , <b>2e</b> , <b>4a</b> , <b>4d</b> , <b>5</b> , <b>6d</b> , and <b>6e</b> ..... | S48-S51 |

## 1. NMR spectra of compounds

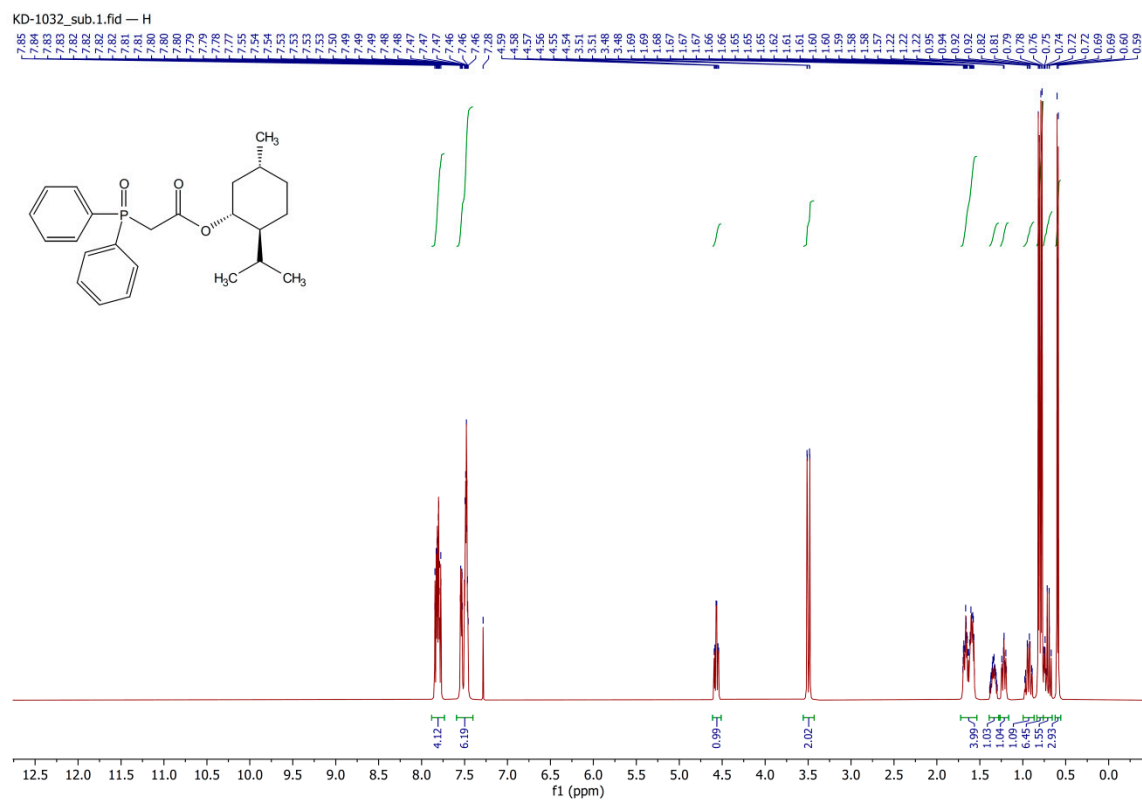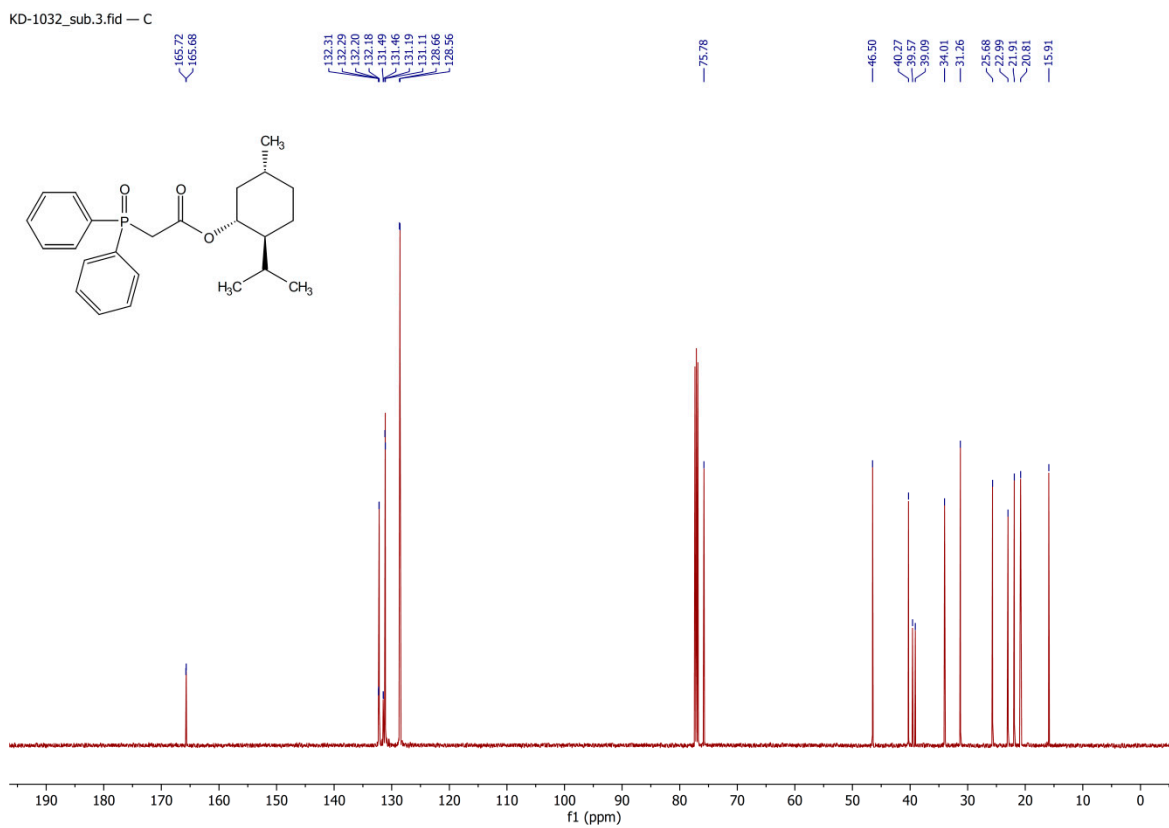

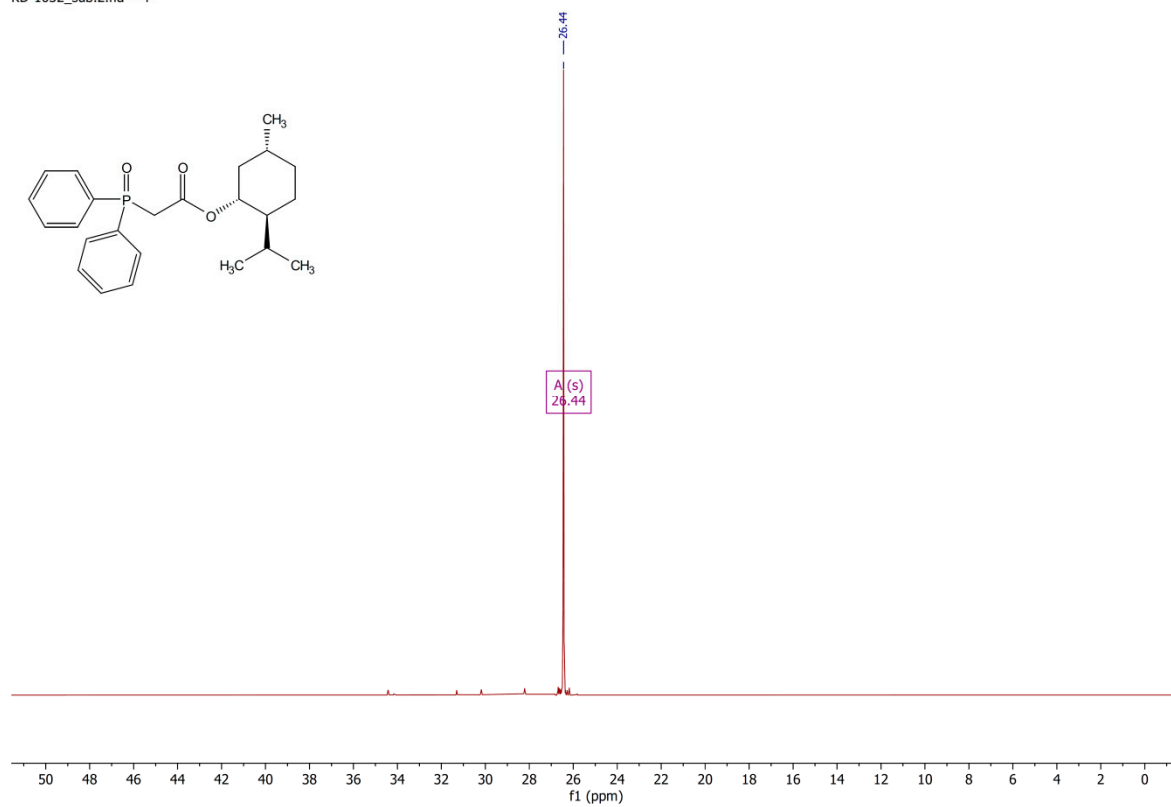

**Figure S-1.** <sup>1</sup>H NMR (500 MHz), <sup>13</sup>C NMR (126 MHz) and <sup>31</sup>P NMR (202 MHz) of L-menthyl diphenylphosphinyllacetate (**1**) in CDCl<sub>3</sub>.

KD-1098K.1.fid —

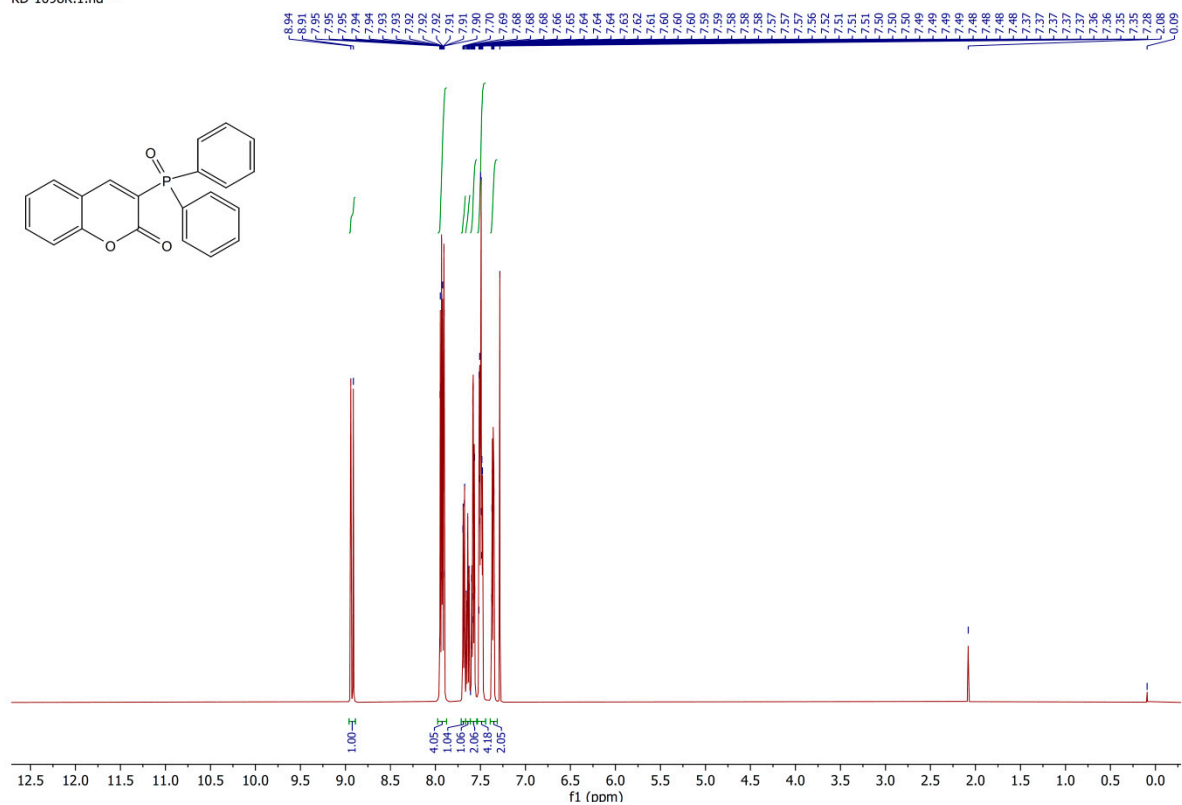

KD-1098K.3.fid —

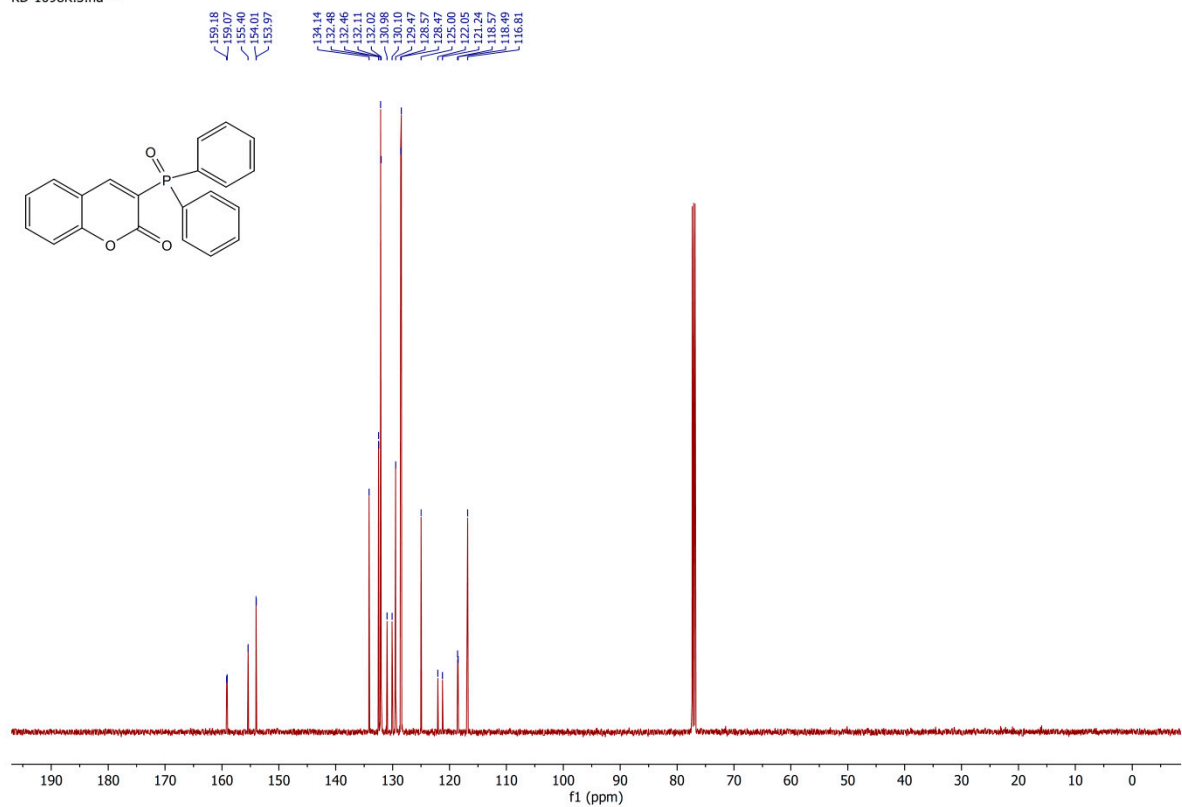

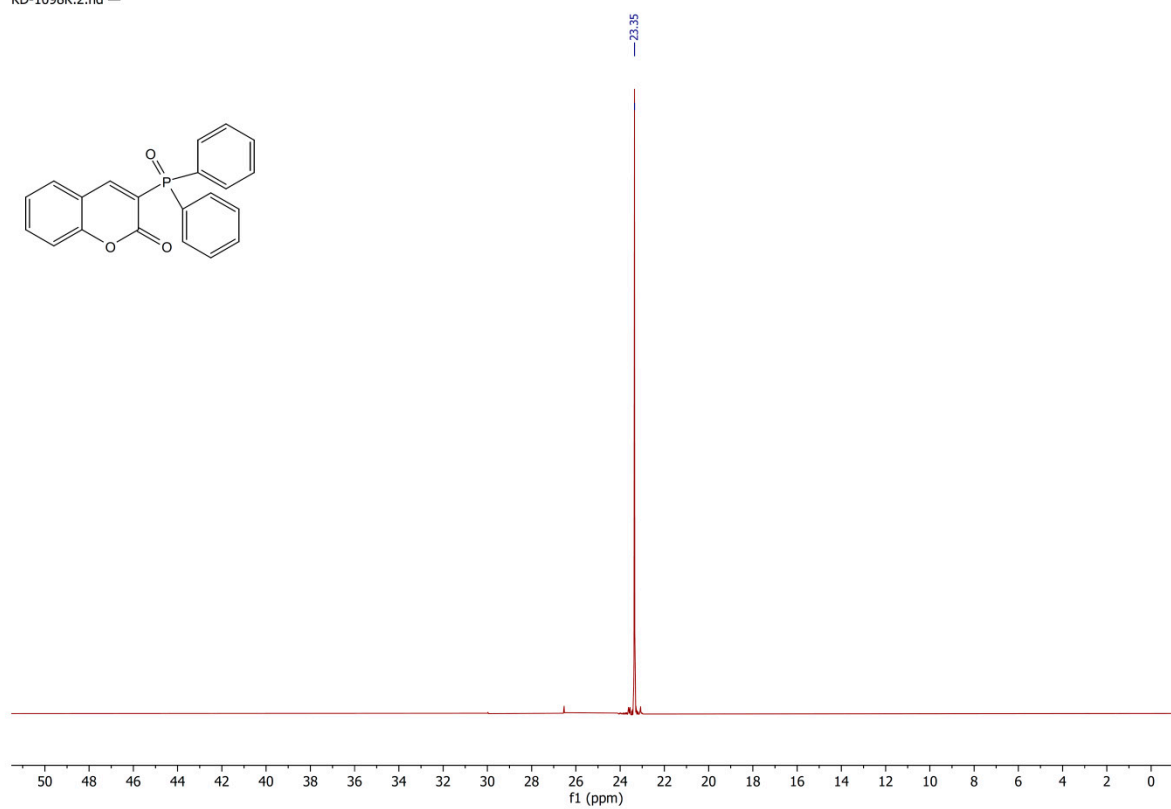

**Figure S-2.**  $^1\text{H}$  NMR (500 MHz),  $^{13}\text{C}$  NMR (126 MHz) and  $^{31}\text{P}$  NMR (202 MHz) of 3-(Diphenylphosphinyl)-2H-chromen-2-one (**2a**) in  $\text{CDCl}_3$ .

SF 1292 PK.2.fid —

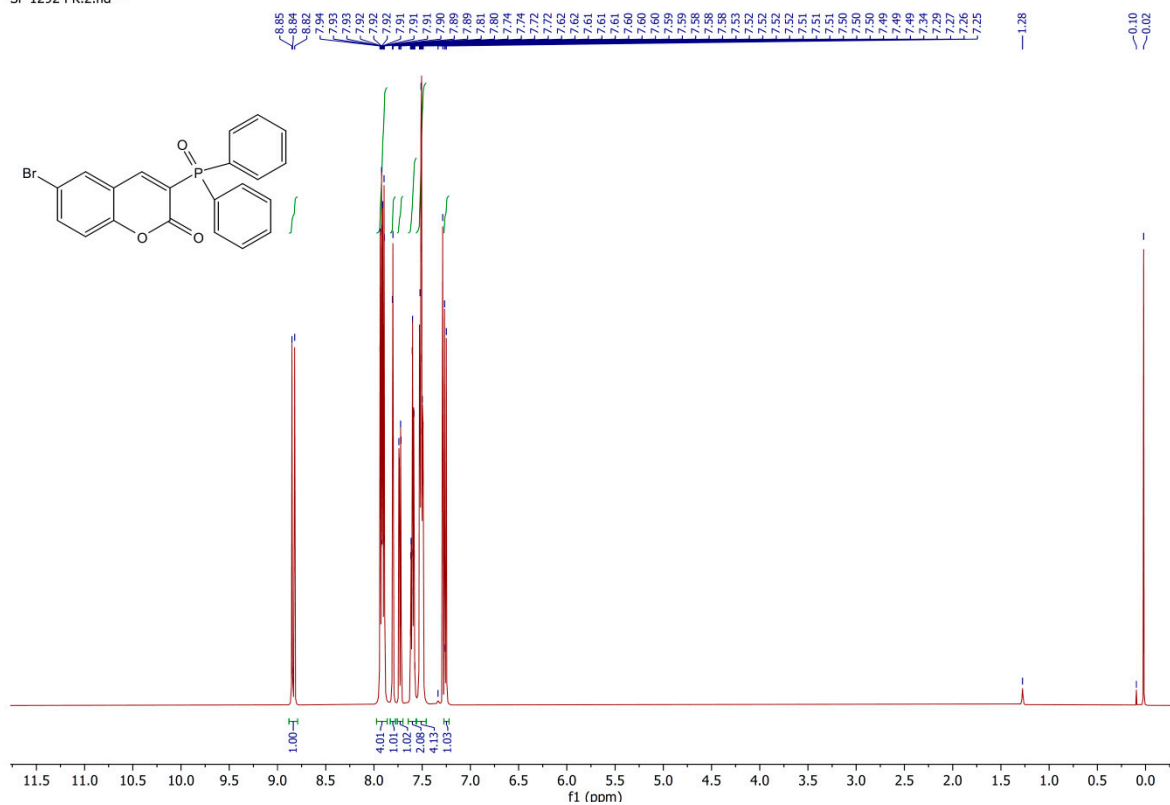

SF 1292 PK.3.fid —

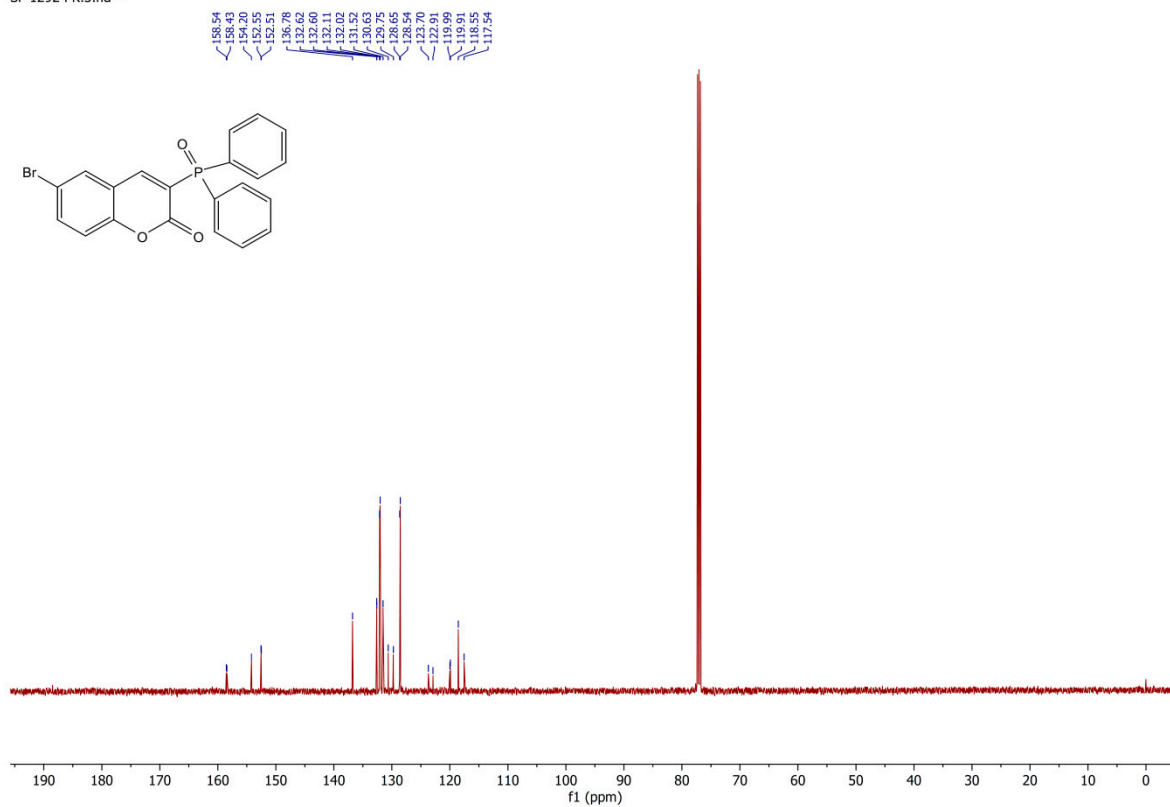

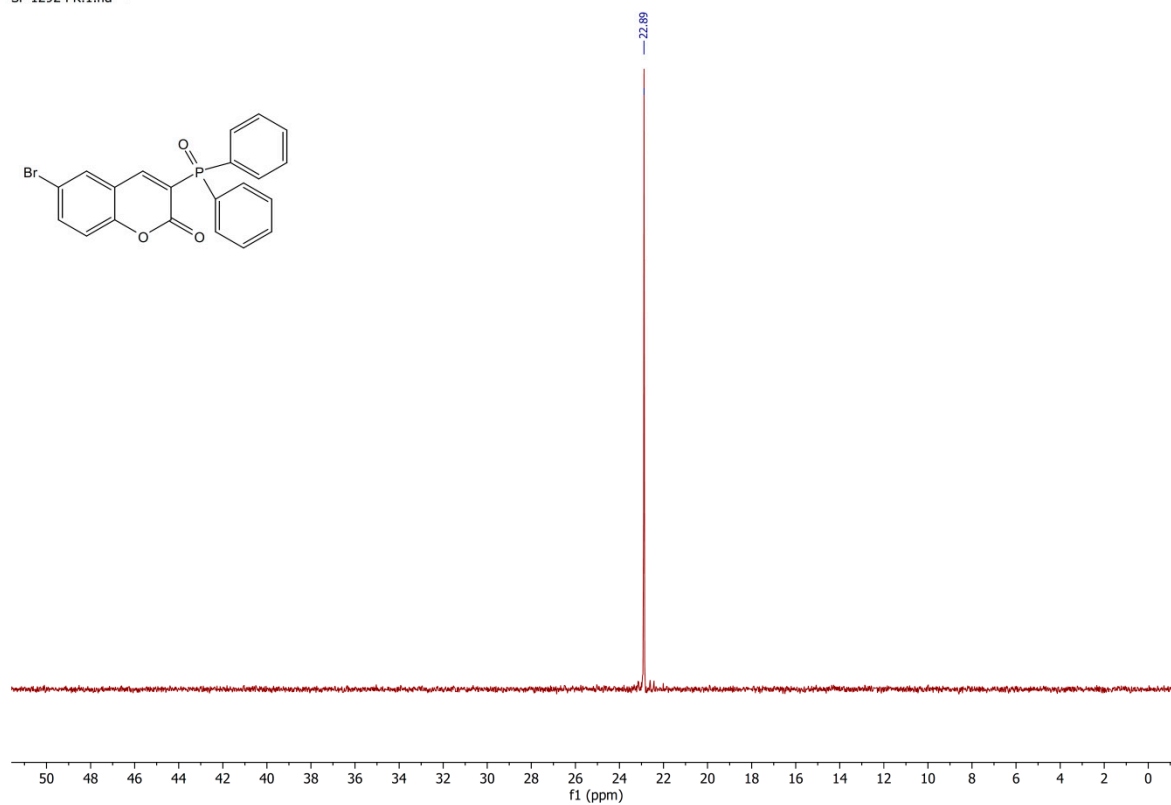

**Figure S-3.**  $^1\text{H}$  NMR (500 MHz),  $^{13}\text{C}$  NMR (126 MHz) and  $^{31}\text{P}$  NMR (202 MHz) of 6-(Bromo)-3-(diphenylphosphinyl)-2H-chromen-2-one (**2b**) in  $\text{CDCl}_3$ .

SF 1296 PK.2.fid —

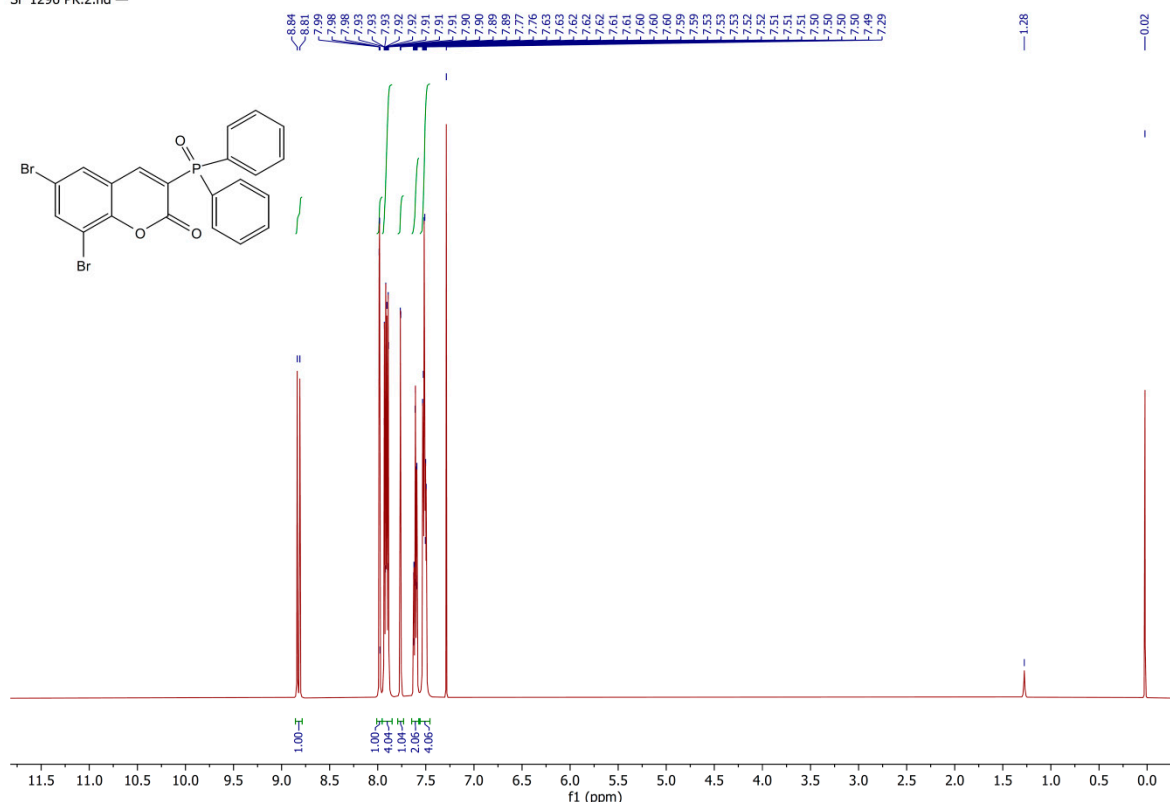

SF 1296 PK.3.fid —

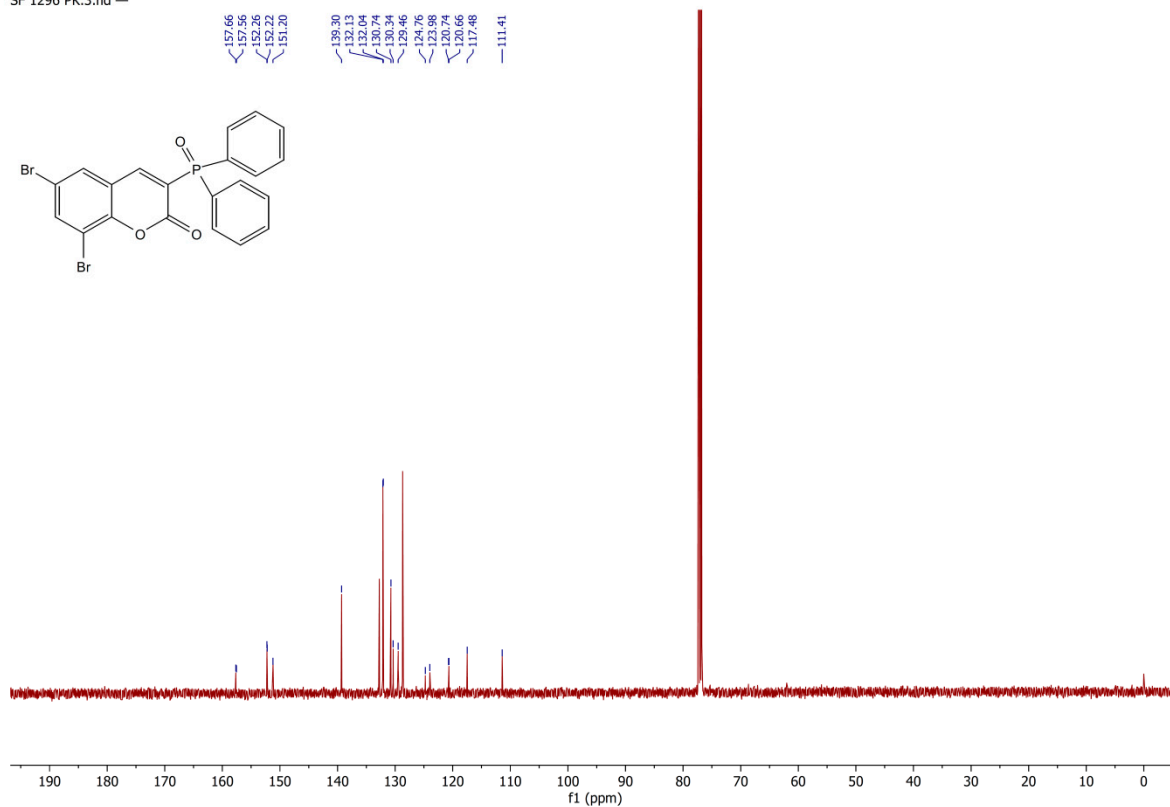



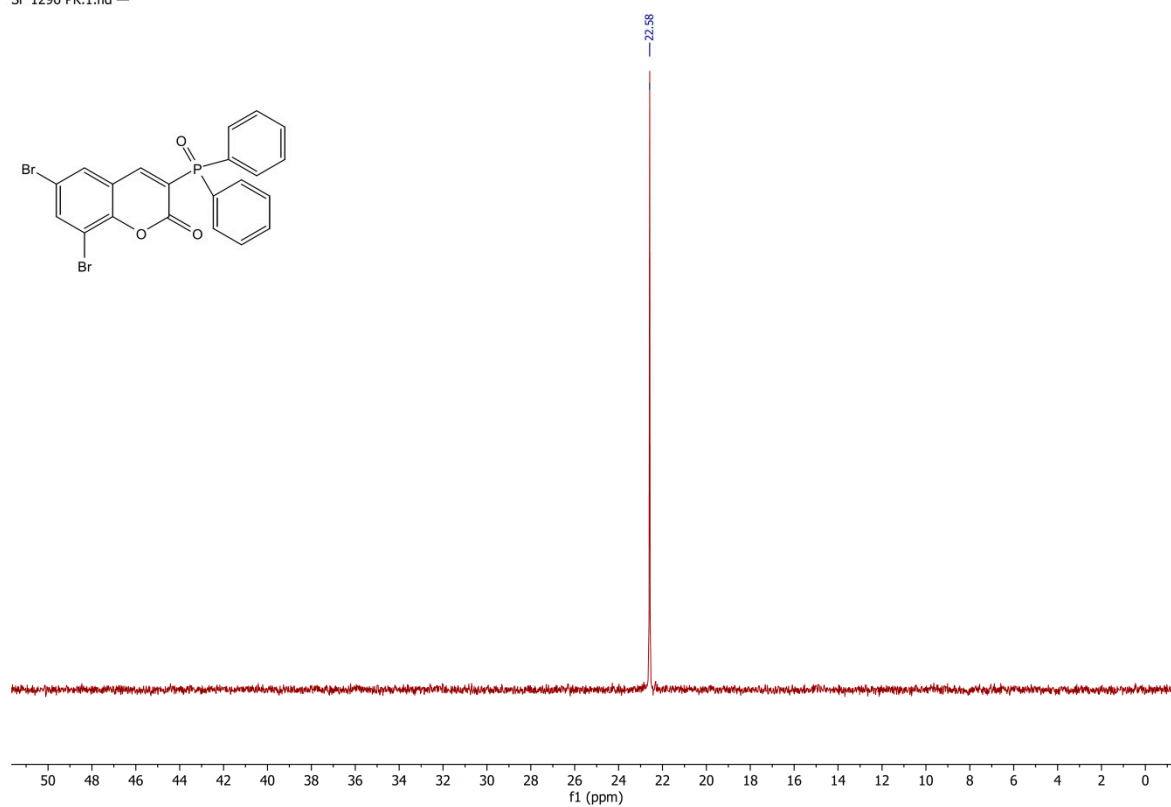

**Figure S-4.**  $^1\text{H}$  NMR (500 MHz),  $^{13}\text{C}$  NMR (126 MHz) and  $^{31}\text{P}$  NMR (202 MHz) of 6,8-(Dibromo)-3-(diphenylphosphinyl)-2H-chromen-2-one (**2c**) in  $\text{CDCl}_3$ .

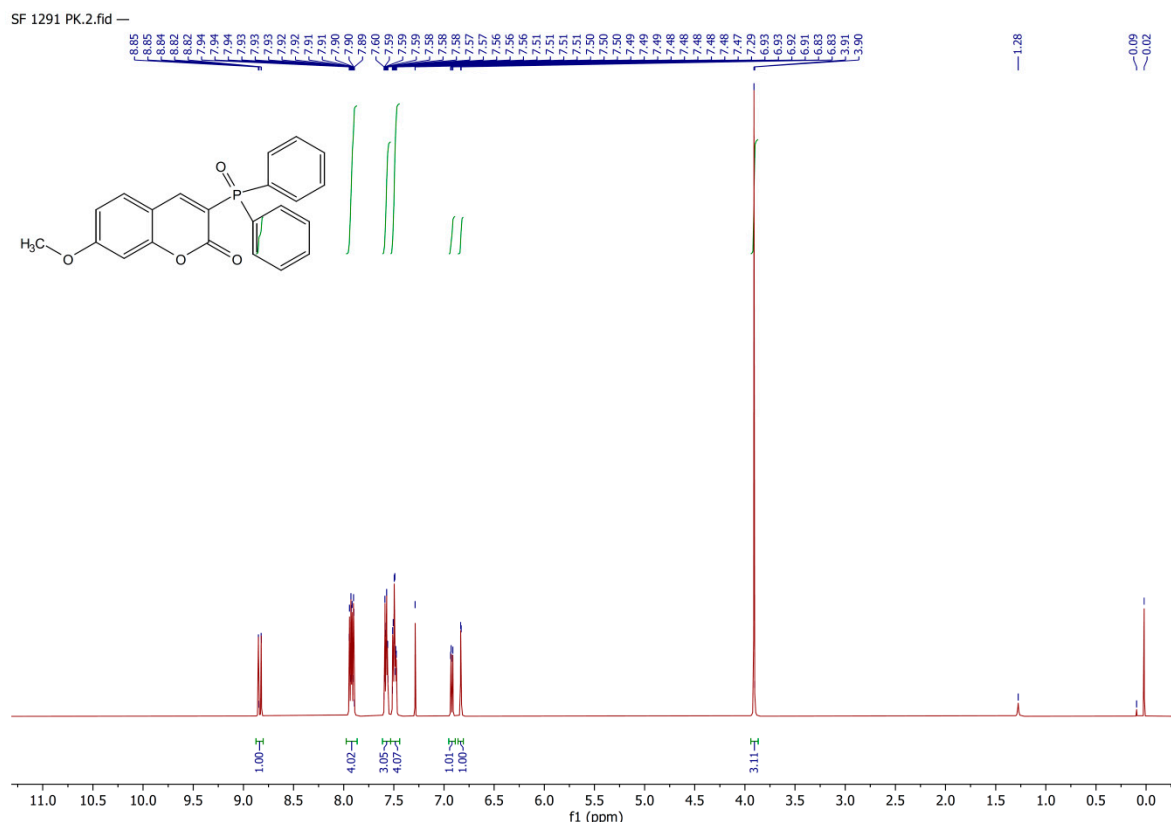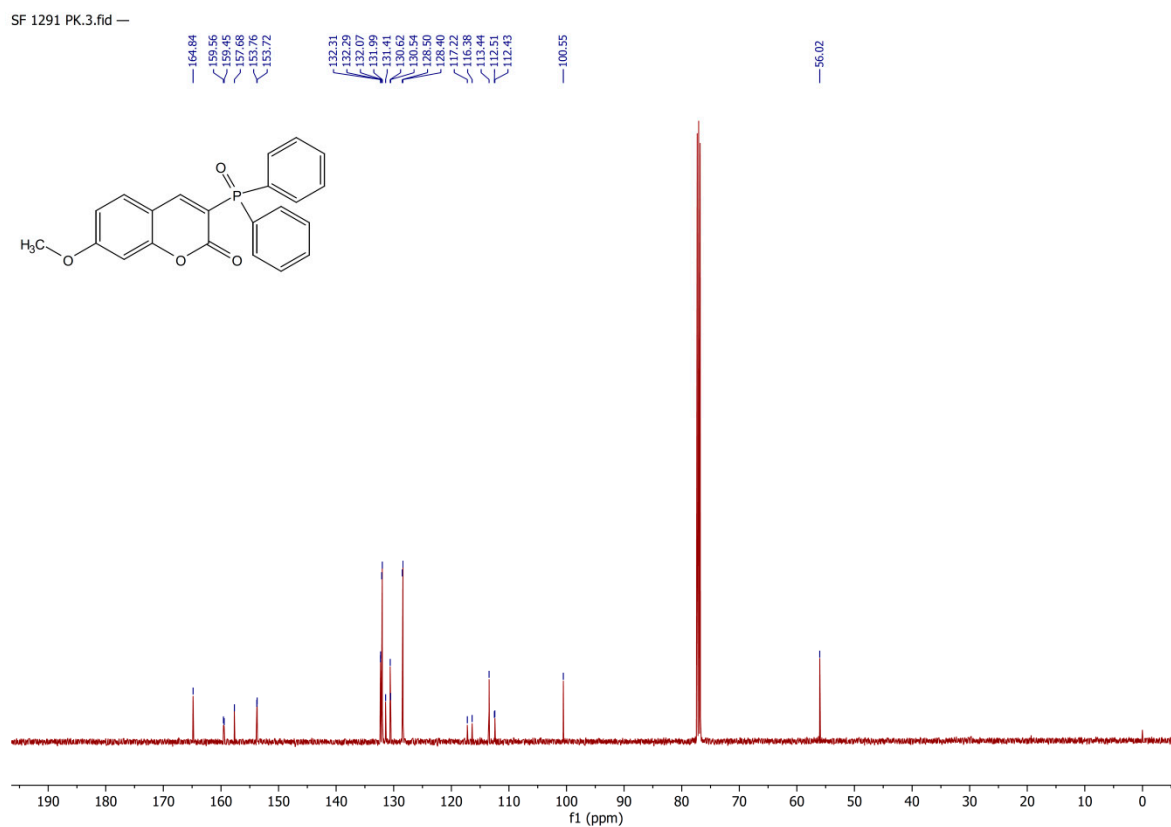

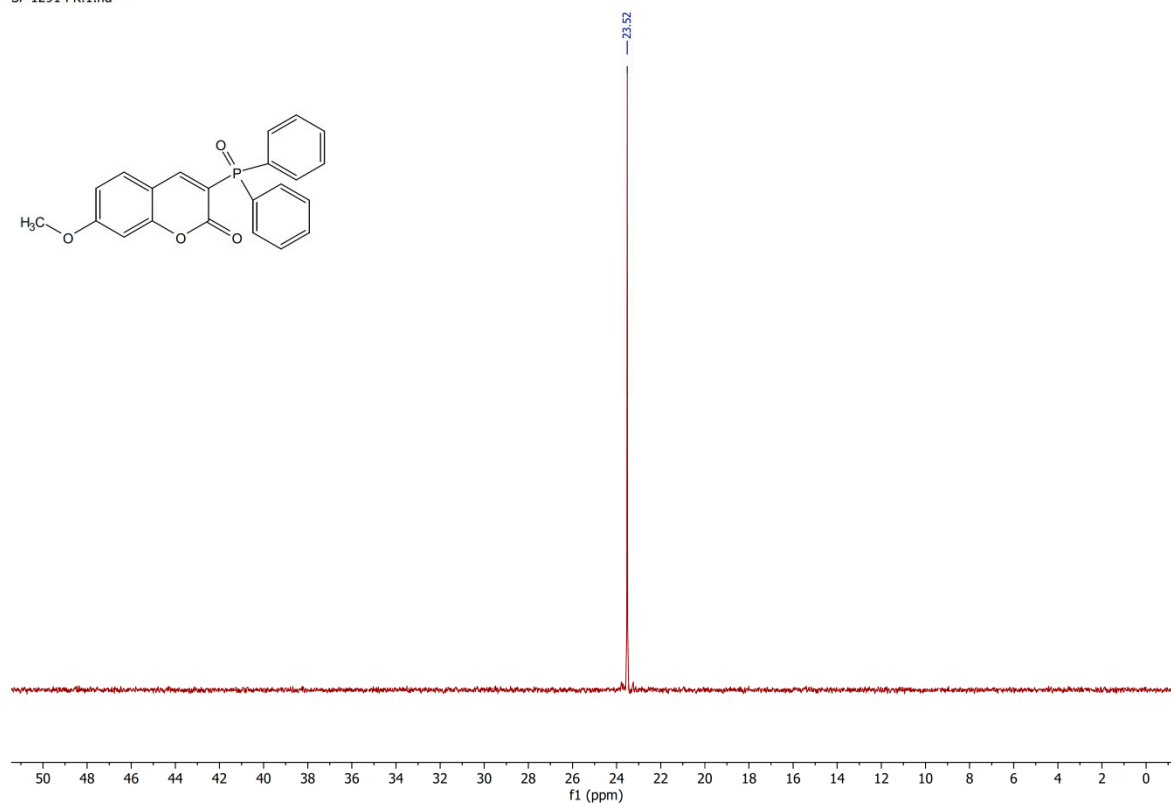

**Figure S-5.** <sup>1</sup>H NMR (500 MHz), <sup>13</sup>C NMR (126 MHz) and <sup>31</sup>P NMR (202 MHz) of 3-(Diphenylphosphinyl)-7-methoxy-2*H*-chromen-2-one (**2d**) in CDCl<sub>3</sub>.



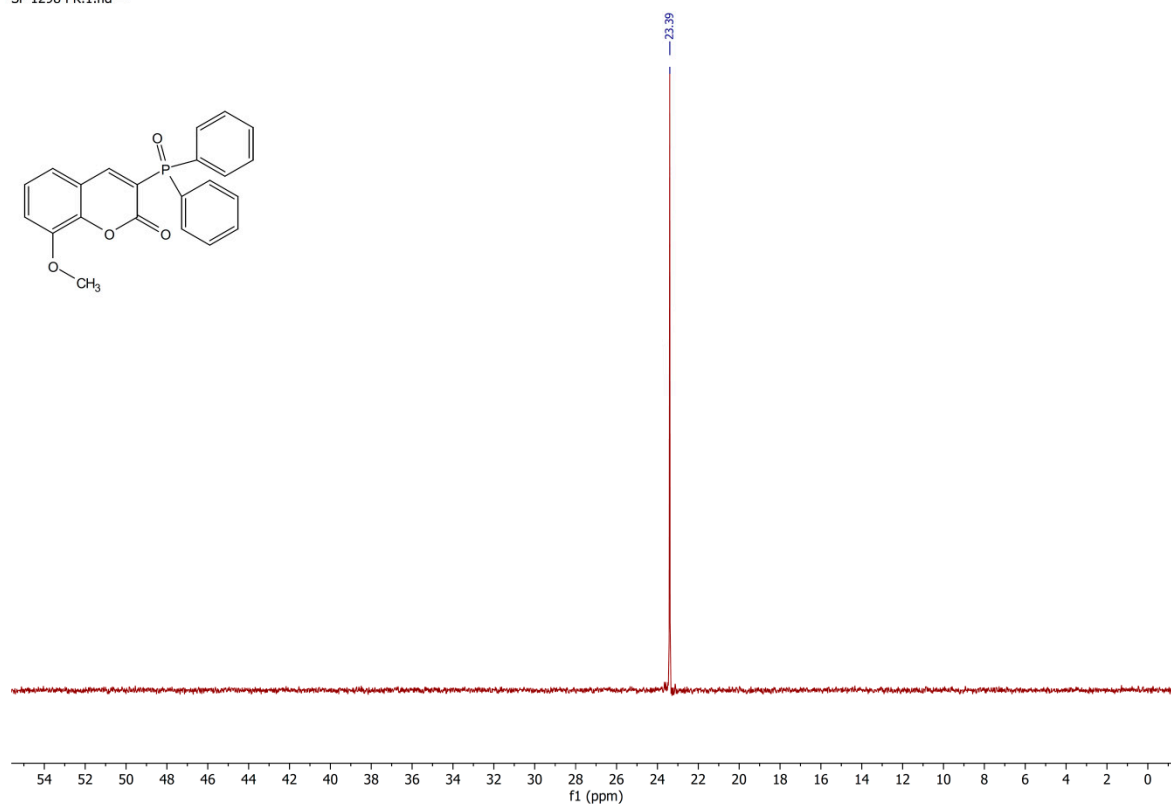

**Figure S-6.** <sup>1</sup>H NMR (500 MHz), <sup>13</sup>C NMR (126 MHz) and <sup>31</sup>P NMR (202 MHz) of 3-(Diphenylphosphinyl)-8-methoxy-2*H*-chromen-2-one (**2e**) in CDCl<sub>3</sub>.

SF 1294 PK.2.fid —

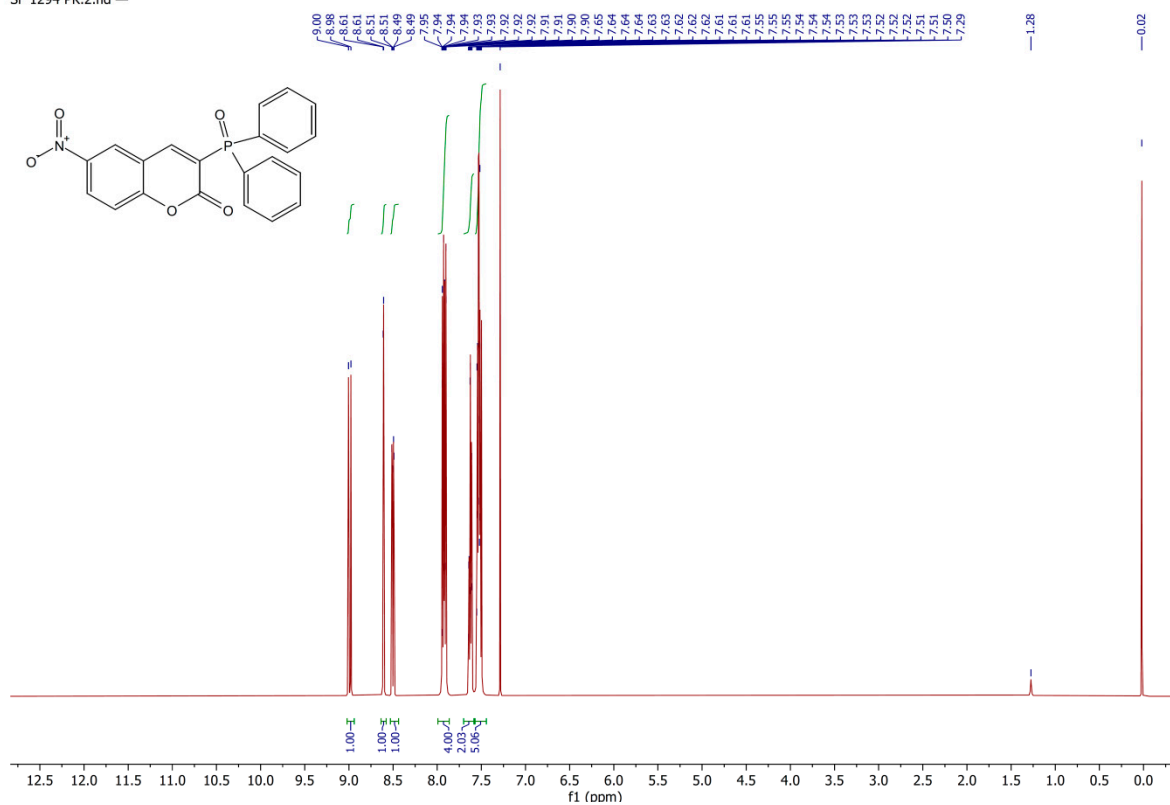

SF 1294 PK.3.fid —

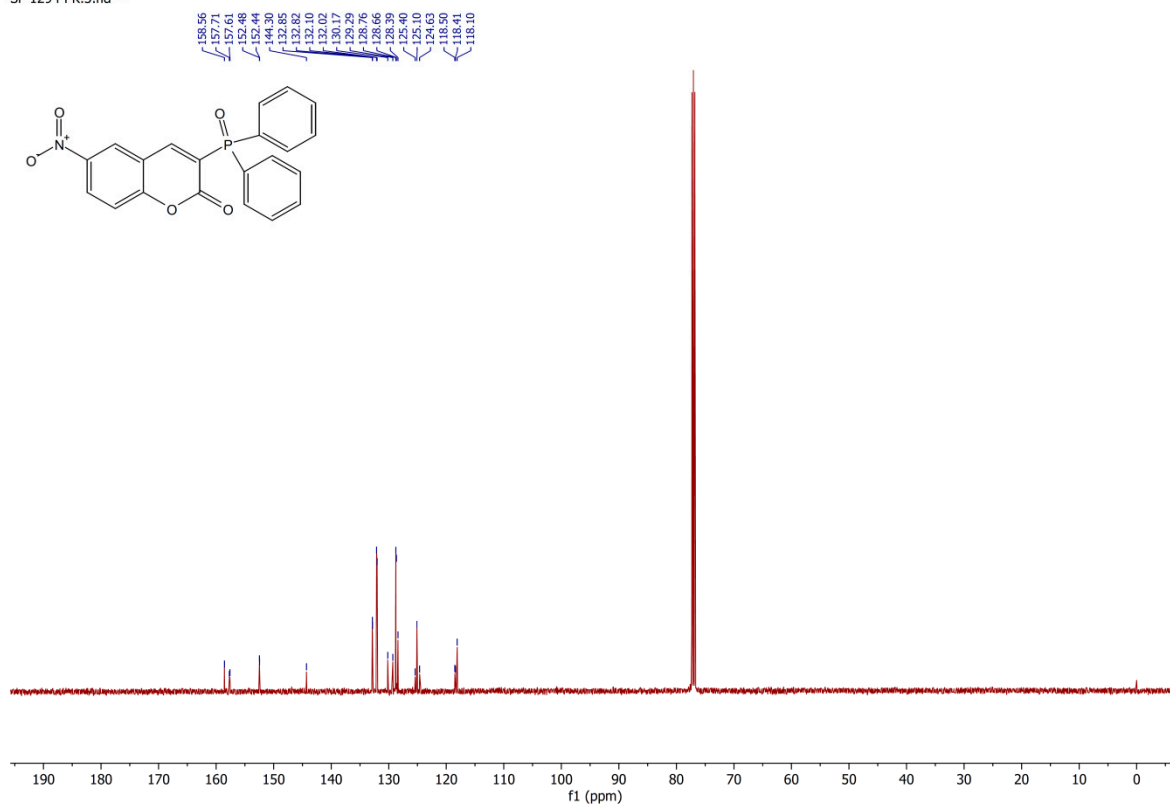

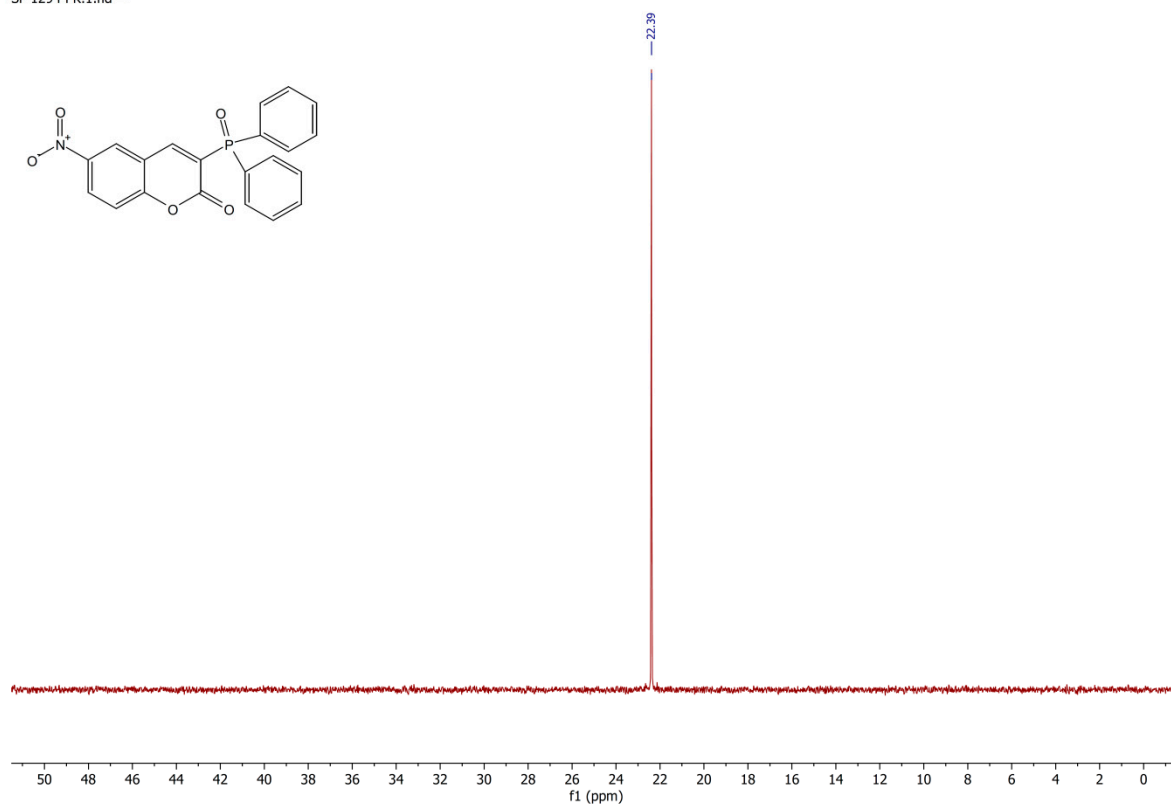

**Figure S-7.**  $^1\text{H}$  NMR (500 MHz),  $^{13}\text{C}$  NMR (126 MHz) and  $^{31}\text{P}$  NMR (202 MHz) of 3-(Diphenylphosphinyl)-6-nitro-2H-chromen-2-one (**2f**) in  $\text{CDCl}_3$ .

SF 1290 PK.2.fid — H

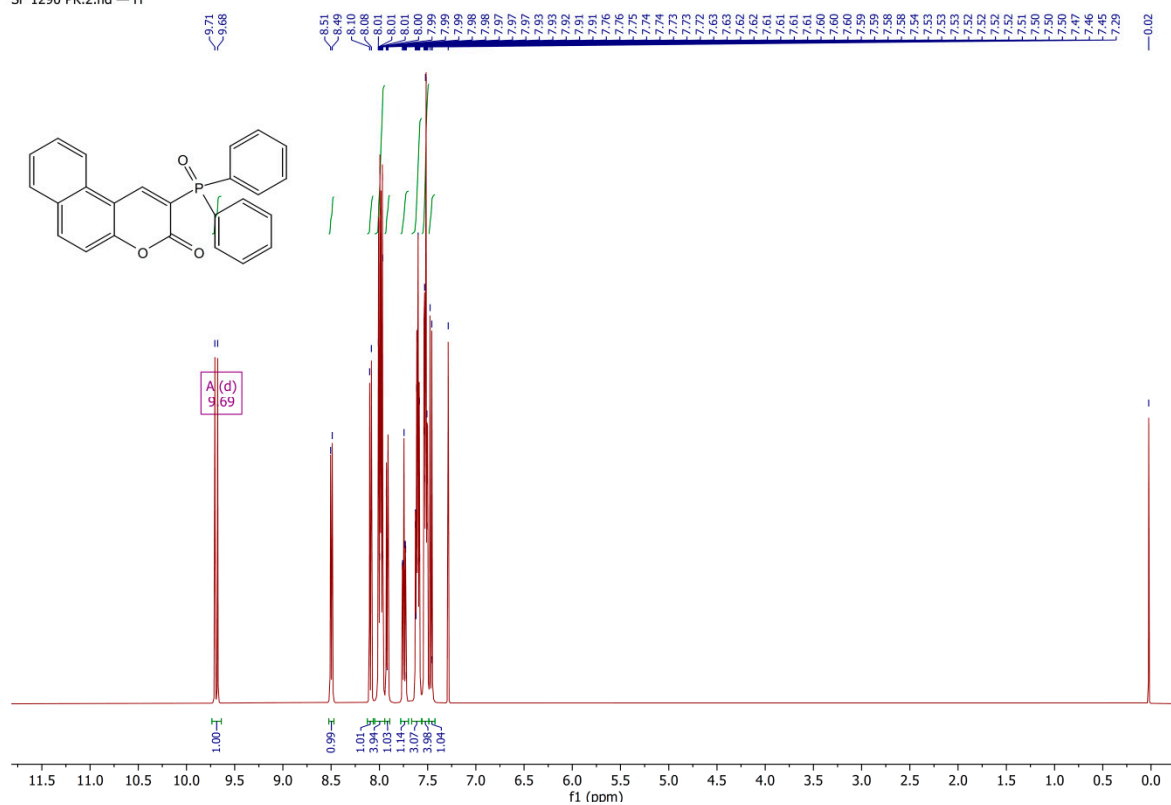

SF 1290 PK.3.fid — C

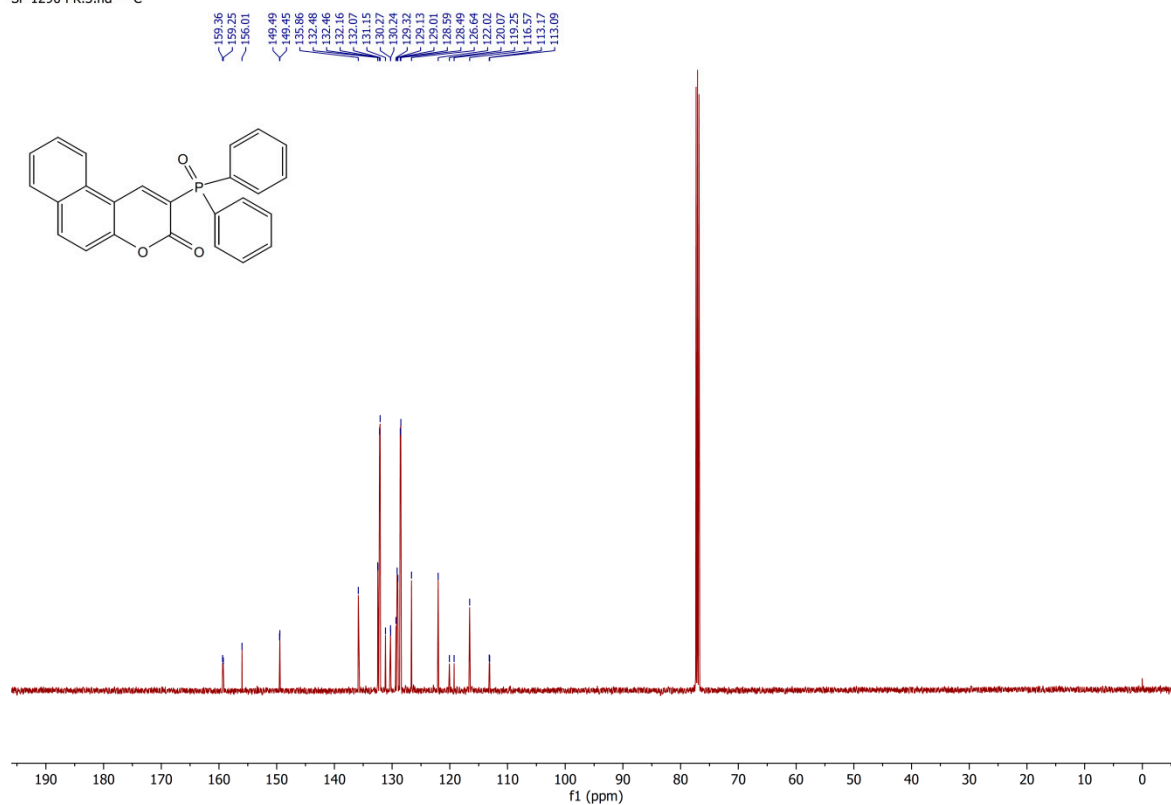



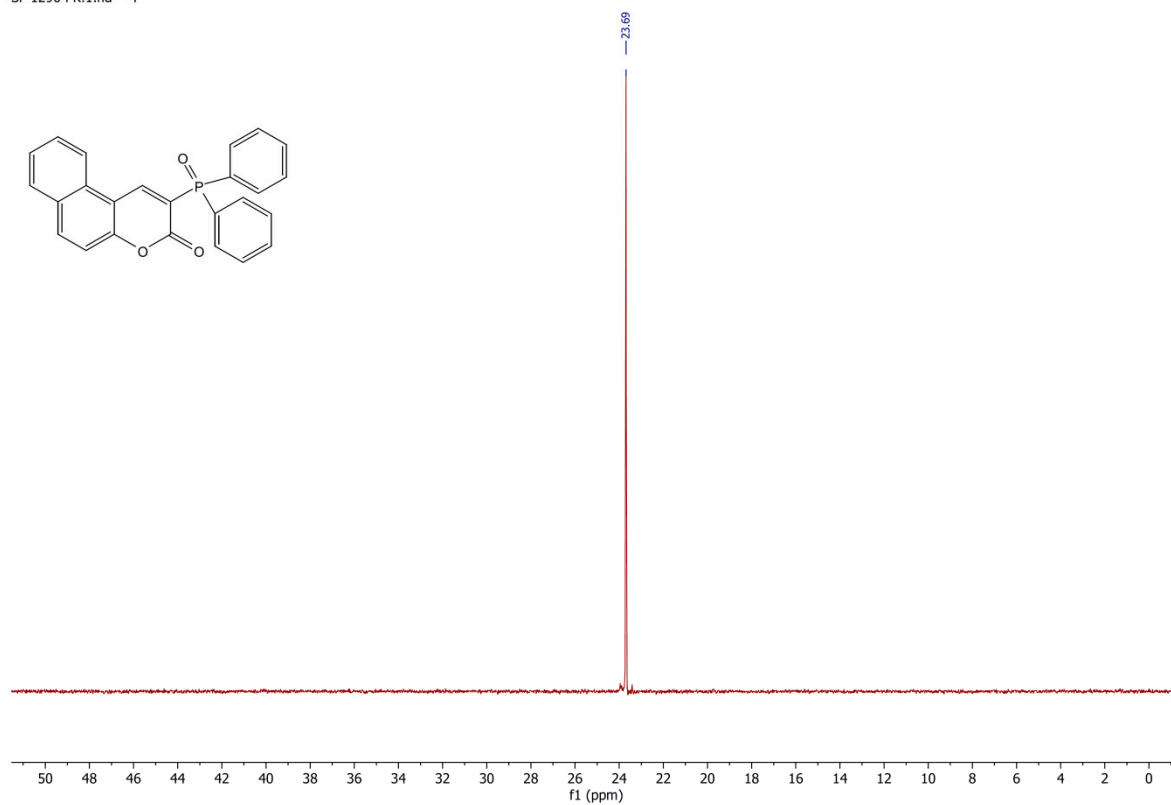

**Figure S-8.**  $^1\text{H}$  NMR (500 MHz),  $^{13}\text{C}$  NMR (126 MHz) and  $^{31}\text{P}$  NMR (202 MHz) of 3-(Diphenylphosphinyl)-2*H*-benzo[h]chromen-2-one (**2g**) in  $\text{CDCl}_3$ .

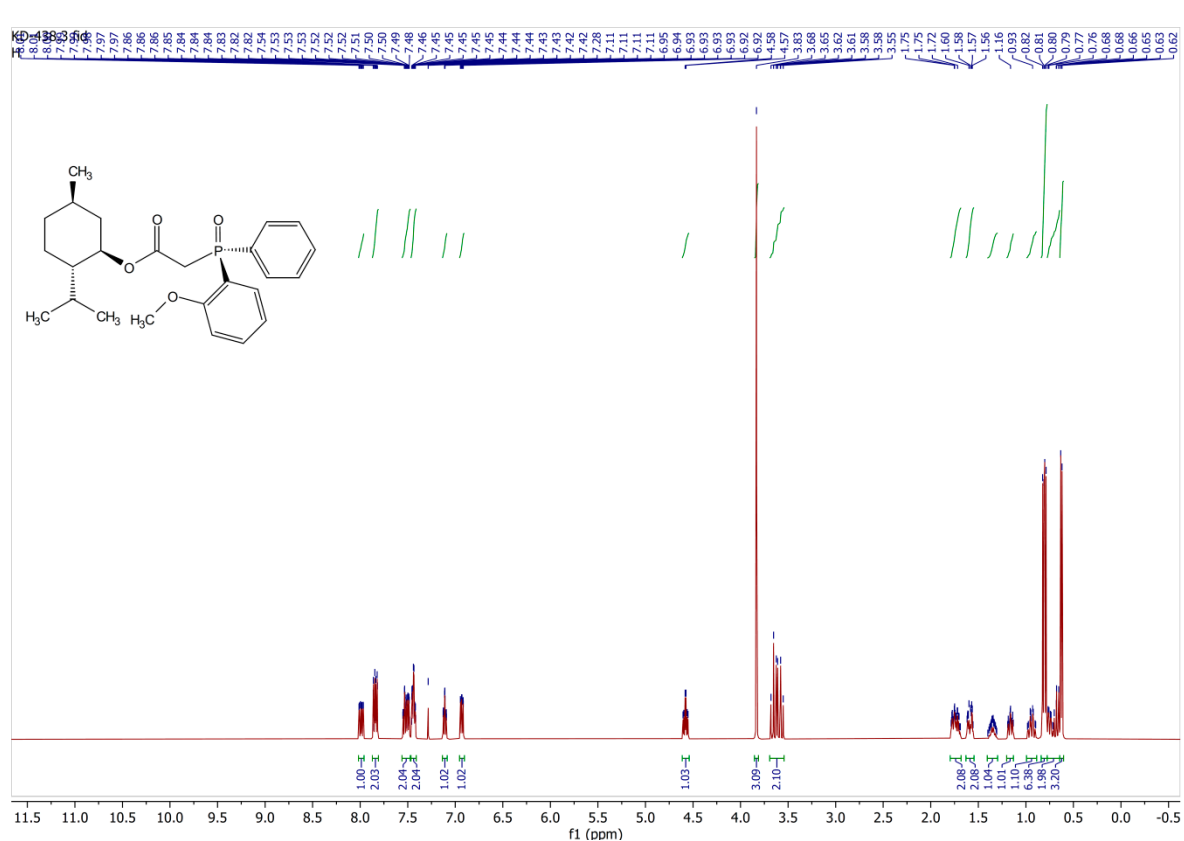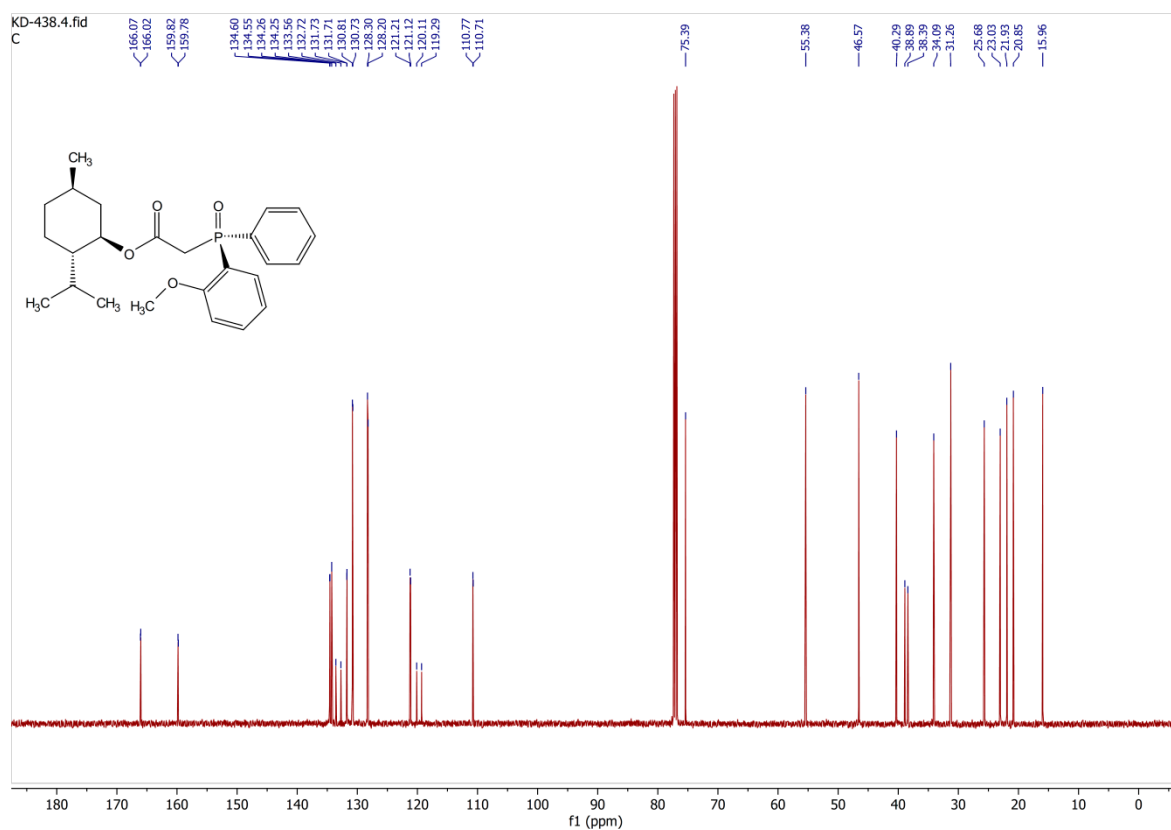

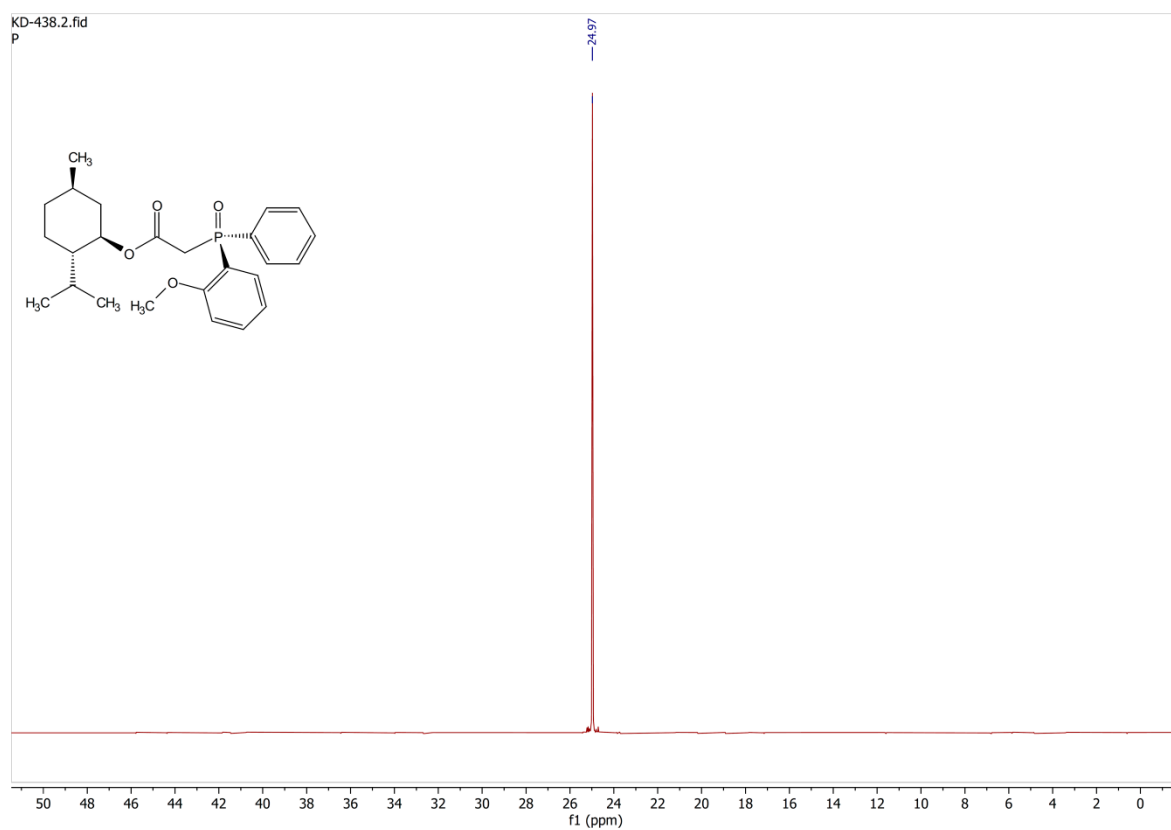

**Figure S-9.**  $^1\text{H}$  NMR (500 MHz),  $^{13}\text{C}$  NMR (126 MHz) and  $^{31}\text{P}$  NMR (202 MHz) of *(S)*-*L*-Menthyl (2-methoxyphenyl)phenylphosphinyllacetate (**3**) in  $\text{CDCl}_3$ .

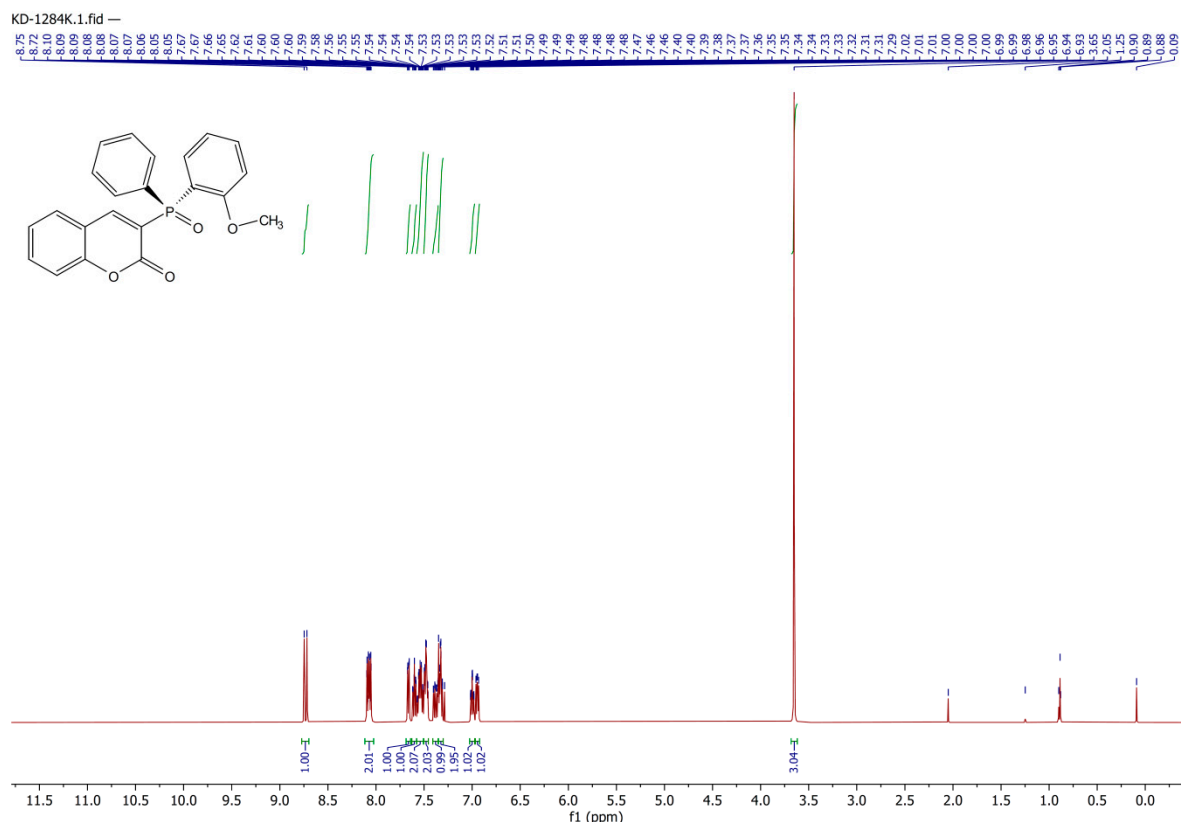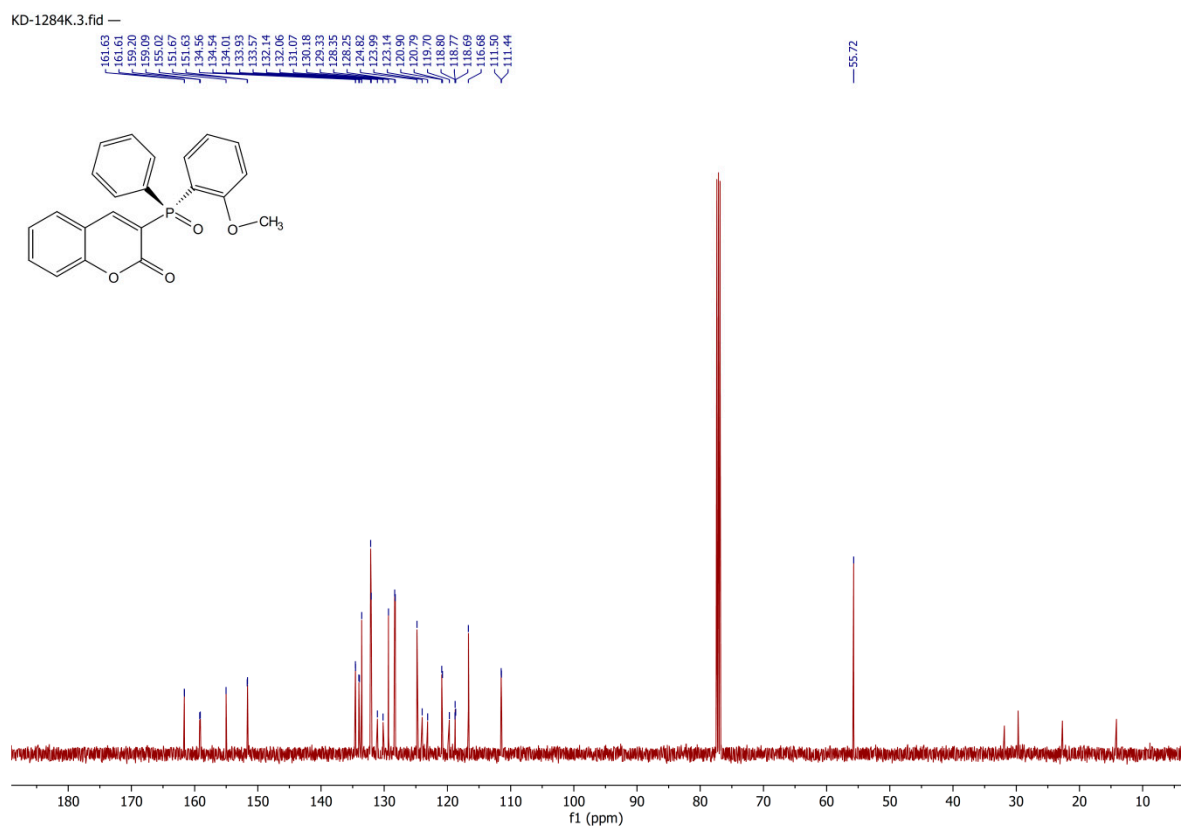

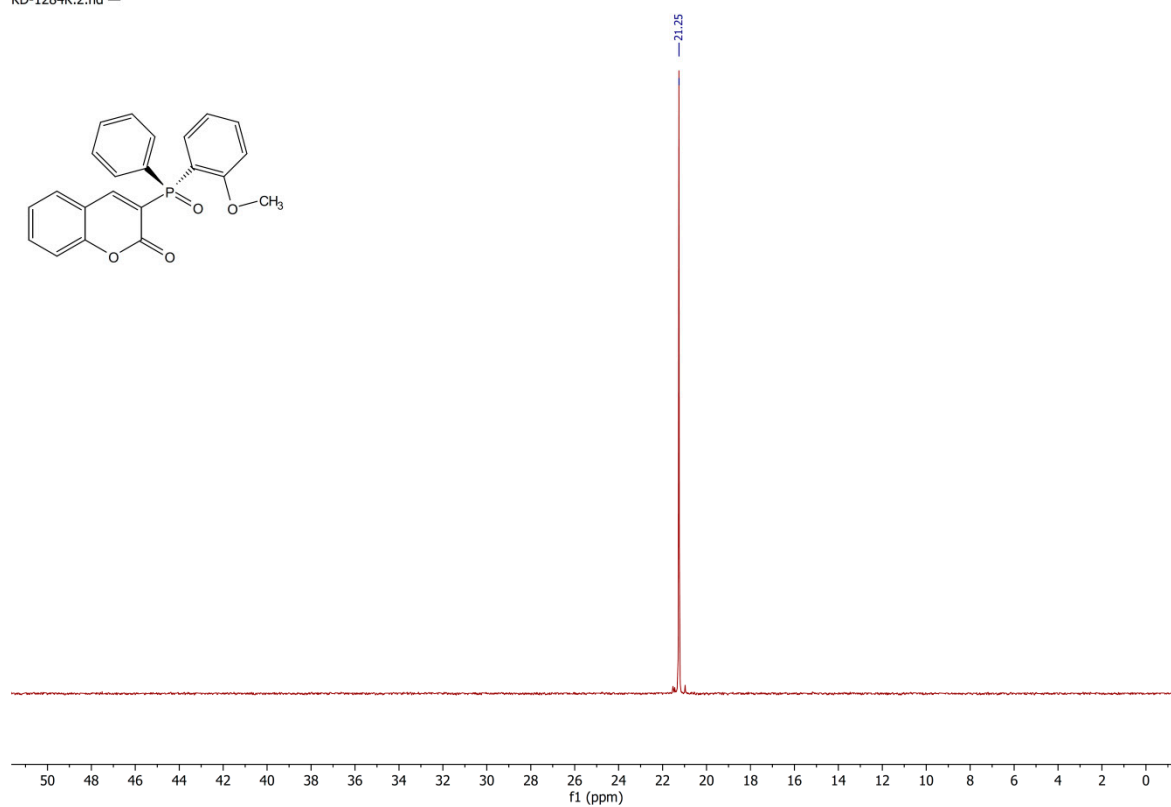

**Figure S-10.** <sup>1</sup>H NMR (500 MHz), <sup>13</sup>C NMR (126 MHz) and <sup>31</sup>P NMR (202 MHz) of 3-(*S*)-(2-Methoxyphenyl)phenylphosphiny-2*H*-chromen-2-one (**4a**) in CDCl<sub>3</sub>.

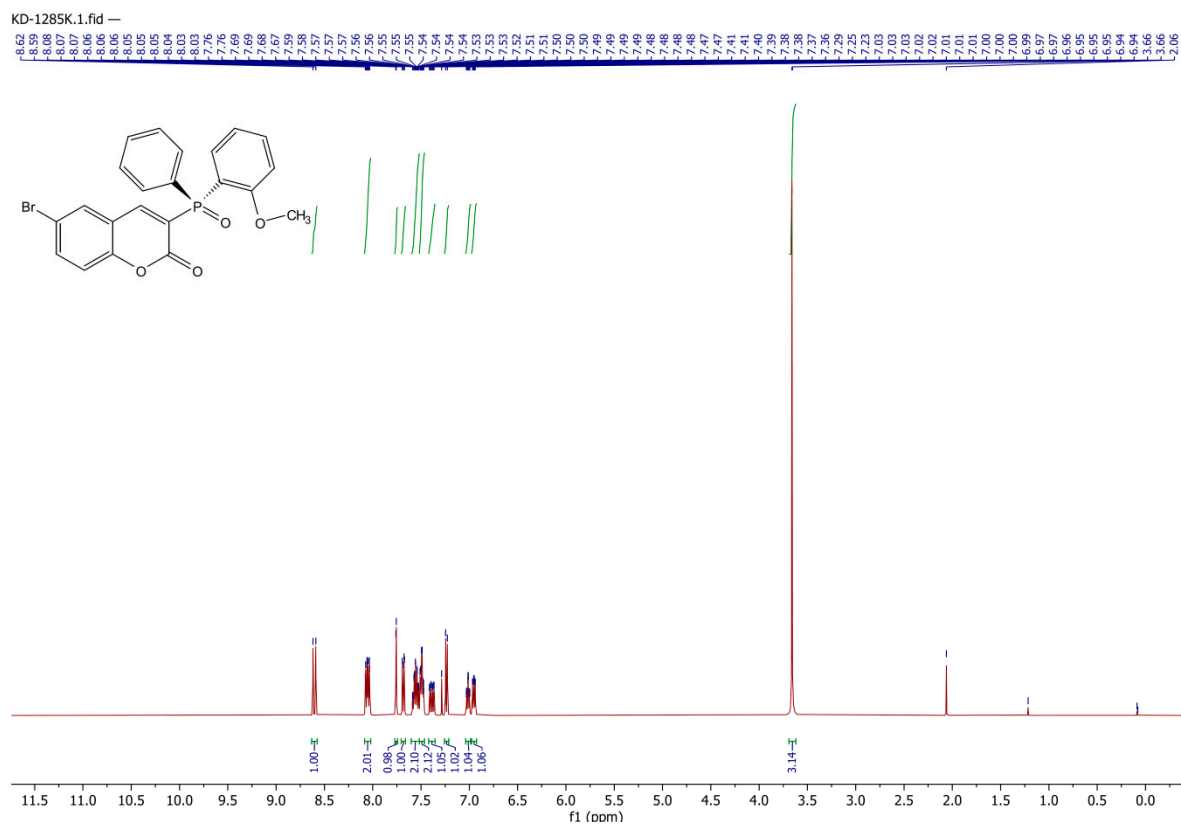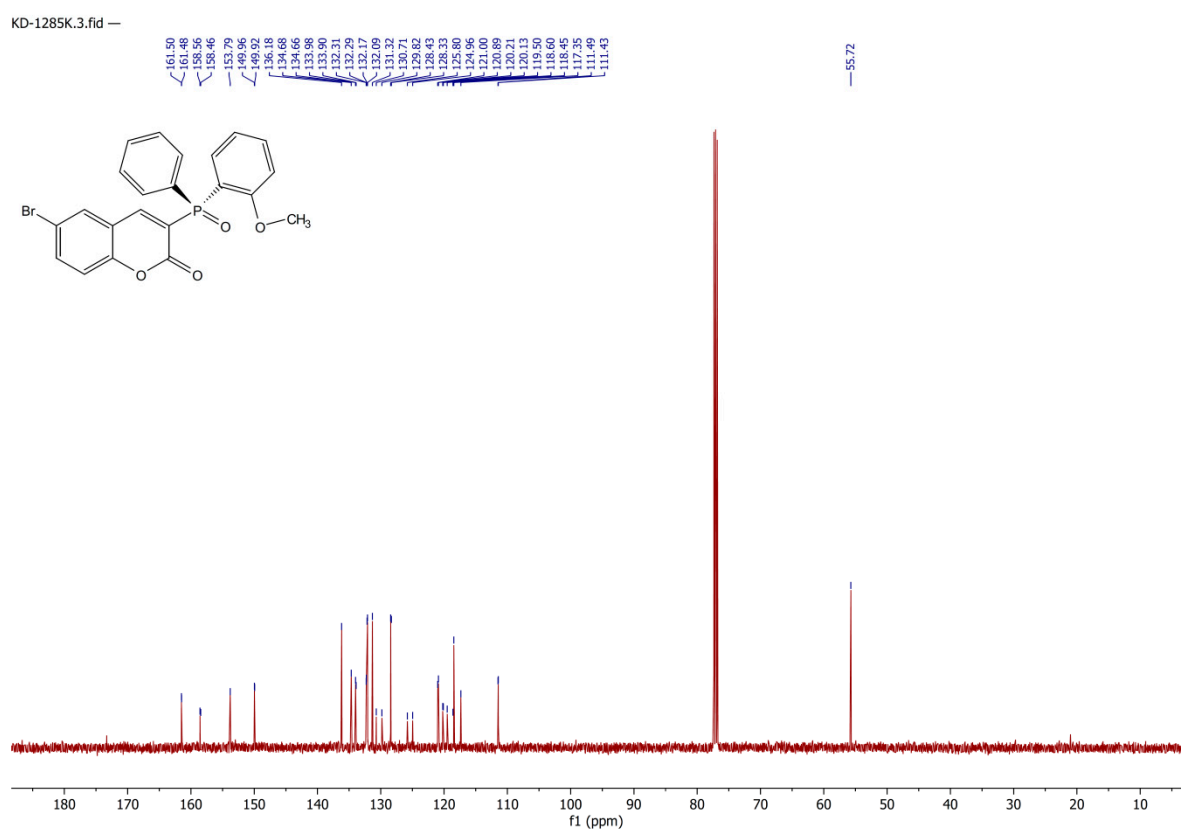

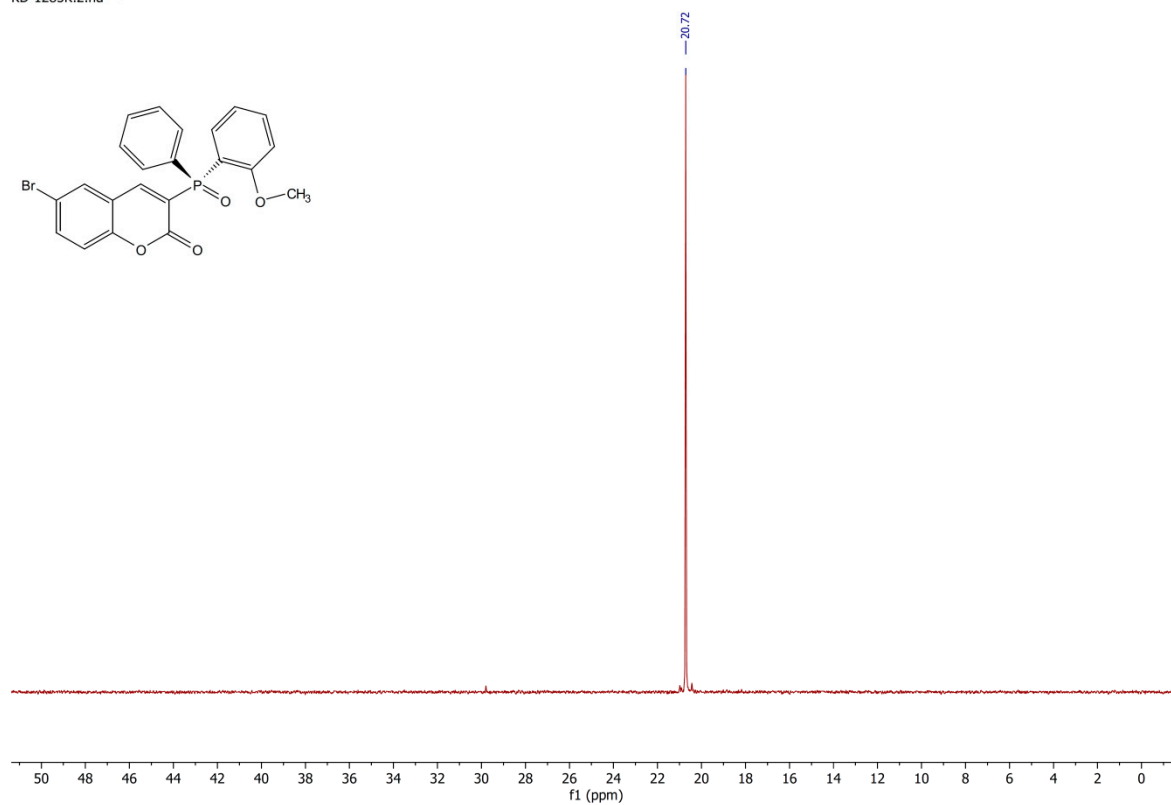

**Figure S-11.** <sup>1</sup>H NMR (500 MHz), <sup>13</sup>C NMR (126 MHz) and <sup>31</sup>P NMR (202 MHz) of 6-(Bromo)-3-(*S*)-(2-methoxyphenyl)phenylphosphinyl)-2*H*-chromen-2-one (**4b**) in CDCl<sub>3</sub>.

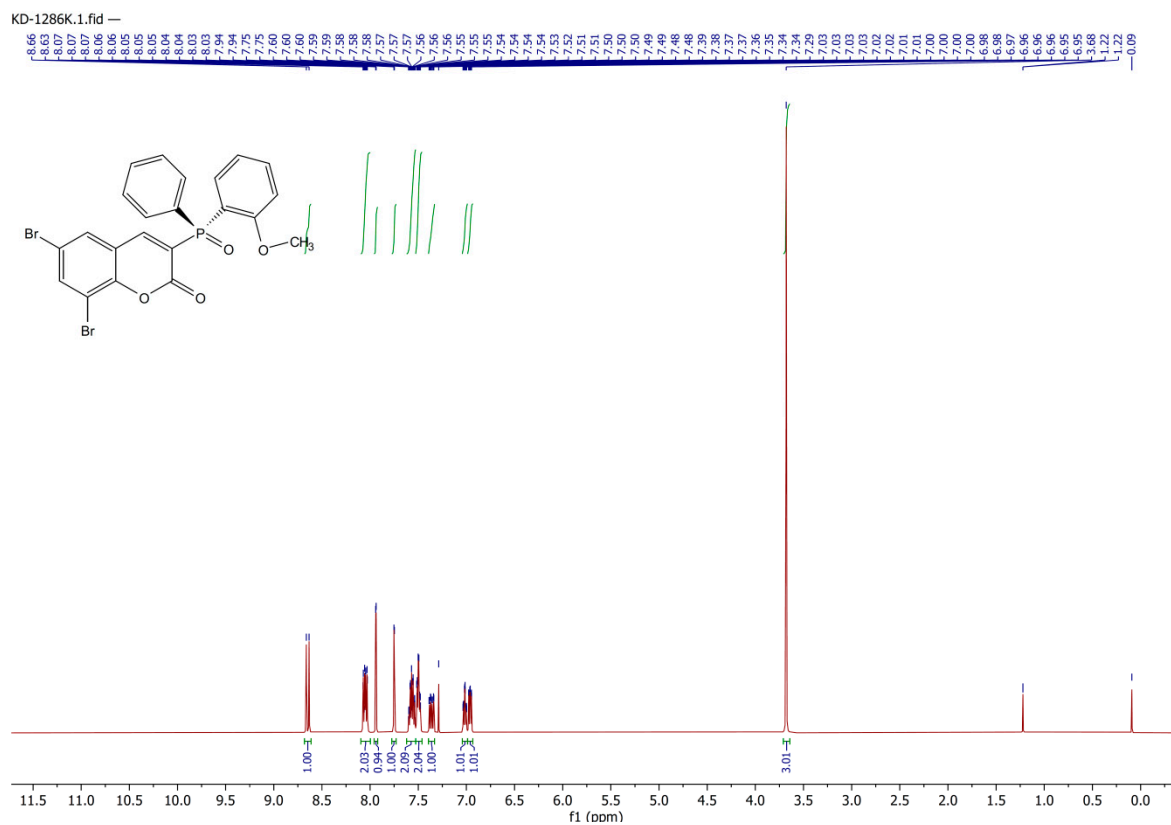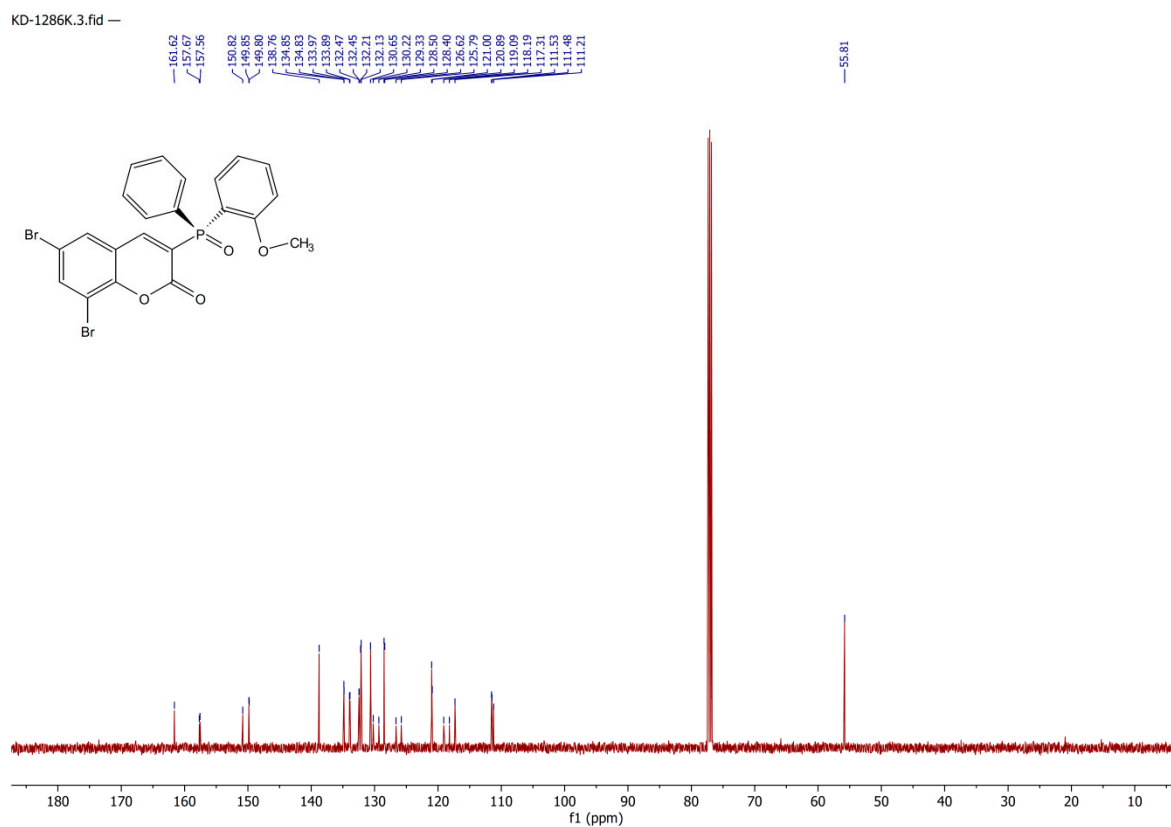



KD-1286K.2.fid —

$^{31}\text{P}$  NMR (202 MHz, Chloroform-*d*)  $\delta$  20.73.

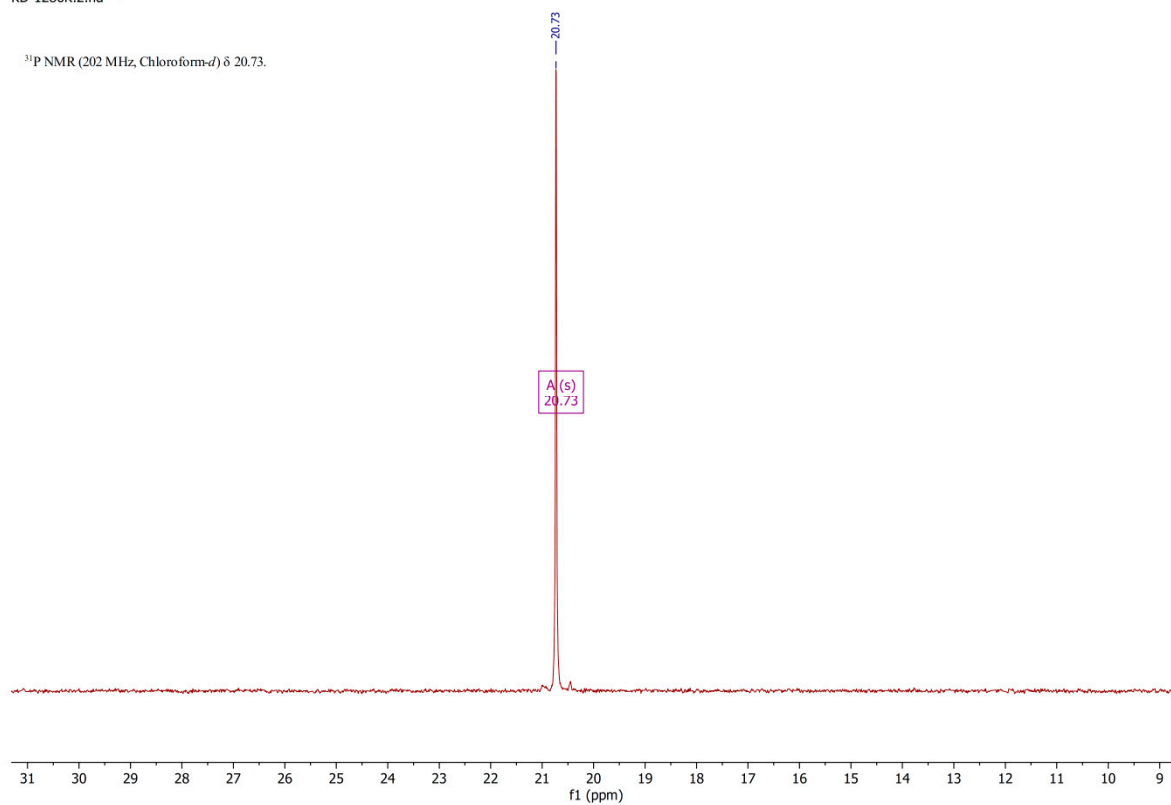

**Figure S-11.**  $^1\text{H}$  NMR (500 MHz),  $^{13}\text{C}$  NMR (126 MHz) and  $^{31}\text{P}$  NMR (202 MHz) of 6,8-(Dibromo)-3-(*S**P*)-(2-methoxyphenyl)phenylphosphiny)-2*H*-chromen-2-one (**4c**) in  $\text{CDCl}_3$ .

KD-1288K.1.fid —

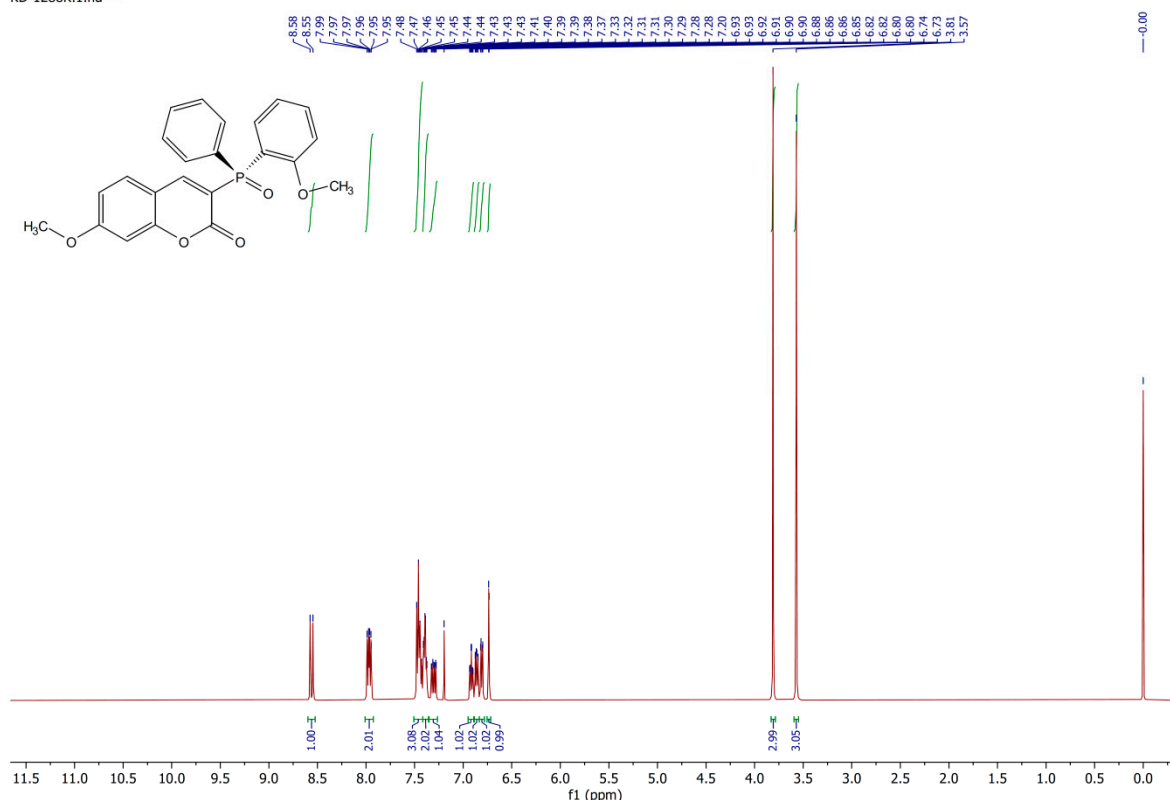

KD-1288K.3.fid —

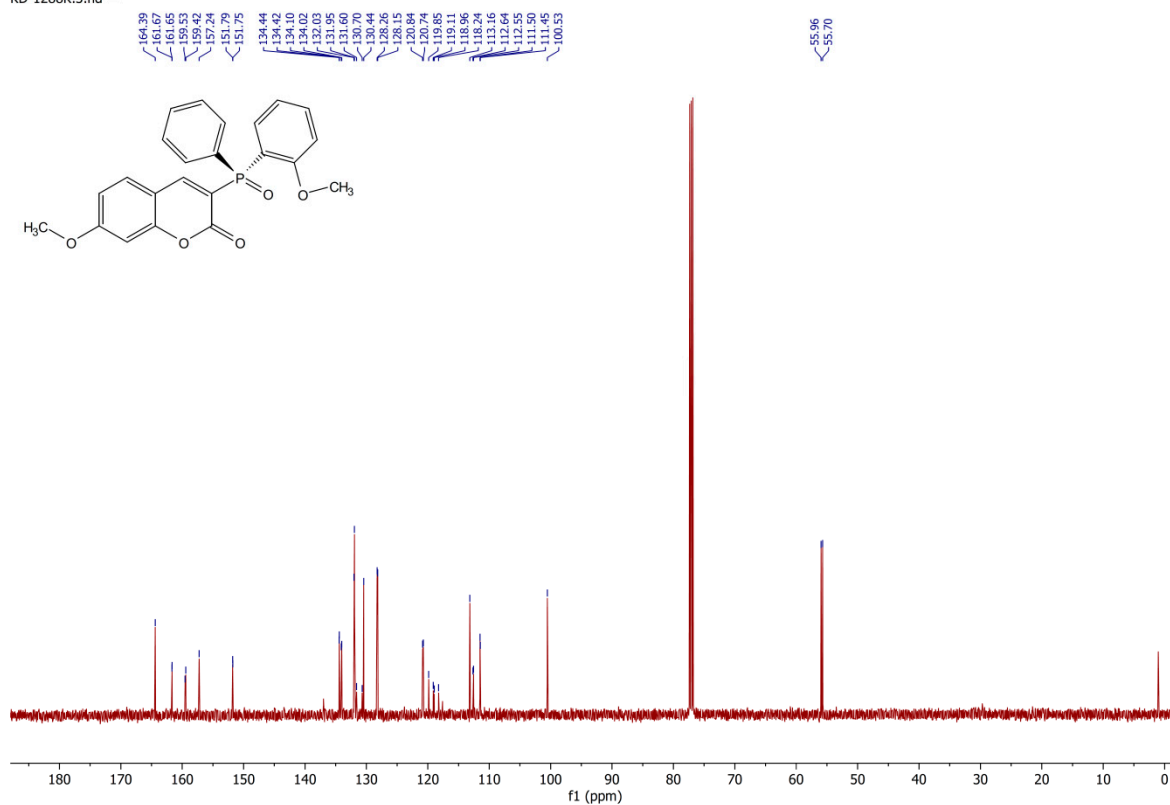

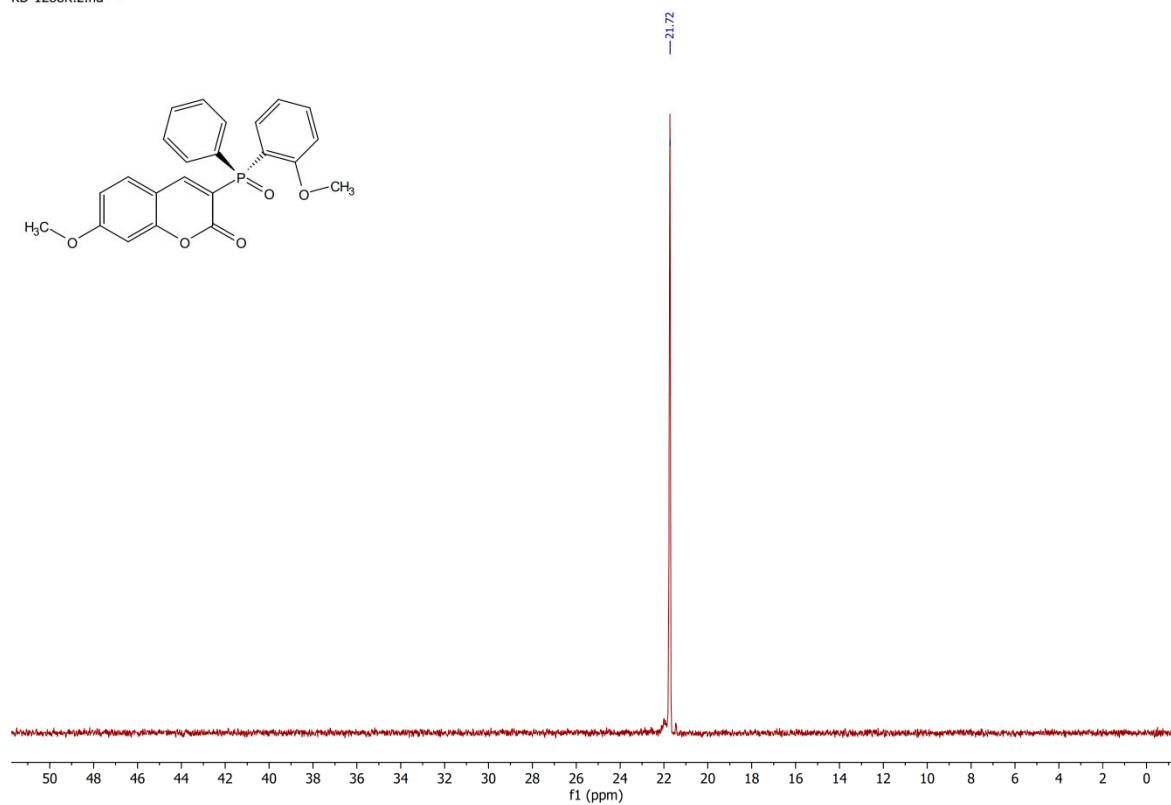

**Figure S-12.** <sup>1</sup>H NMR (500 MHz), <sup>13</sup>C NMR (126 MHz) and <sup>31</sup>P NMR (202 MHz) of 3-(*S*)-(2-Methoxyphenyl)phenylphosphinyl)-7-methoxy-2*H*-chromen-2-one (**4d**) in CDCl<sub>3</sub>.

Chemical structure: COP(=O)(c1ccccc1)[C@H]2C(=O)Oc3ccc(OC)cc3O2

<sup>1</sup>H NMR spectrum (400 MHz, CDCl<sub>3</sub>) showing peaks from 0.00 to 8.64 ppm. Integration values are provided below the peaks: 1.00, 2.03, 3.06, 2.02, 1.02, 2.01, 1.00, 2.04, 3.03, and 3.01.

Chemical structure of the compound is shown above the spectrum. The structure is a benzodioxole derivative with a methoxy group at the 2-position and a phosphonate group at the 3-position. The phosphonate group is a diphenyl phosphonate with a methoxy group on one of the phenyl rings.

The <sup>13</sup>C NMR spectrum (CDCl<sub>3</sub>) shows the following chemical shifts (ppm):

| Chemical Shift (ppm) |
|----------------------|
| 161.63               |
| 158.64               |
| 158.51               |
| 151.70               |
| 147.04               |
| 144.66               |
| 134.49               |
| 133.98               |
| 132.04               |
| 131.82               |
| 130.30               |
| 128.20               |
| 124.62               |
| 124.35               |
| 123.90               |
| 123.80               |
| 120.73               |
| 120.44               |
| 119.32               |
| 119.25               |
| 118.67               |
| 115.16               |
| 111.43               |
| 111.38               |
| 56.30                |
| 55.72                |

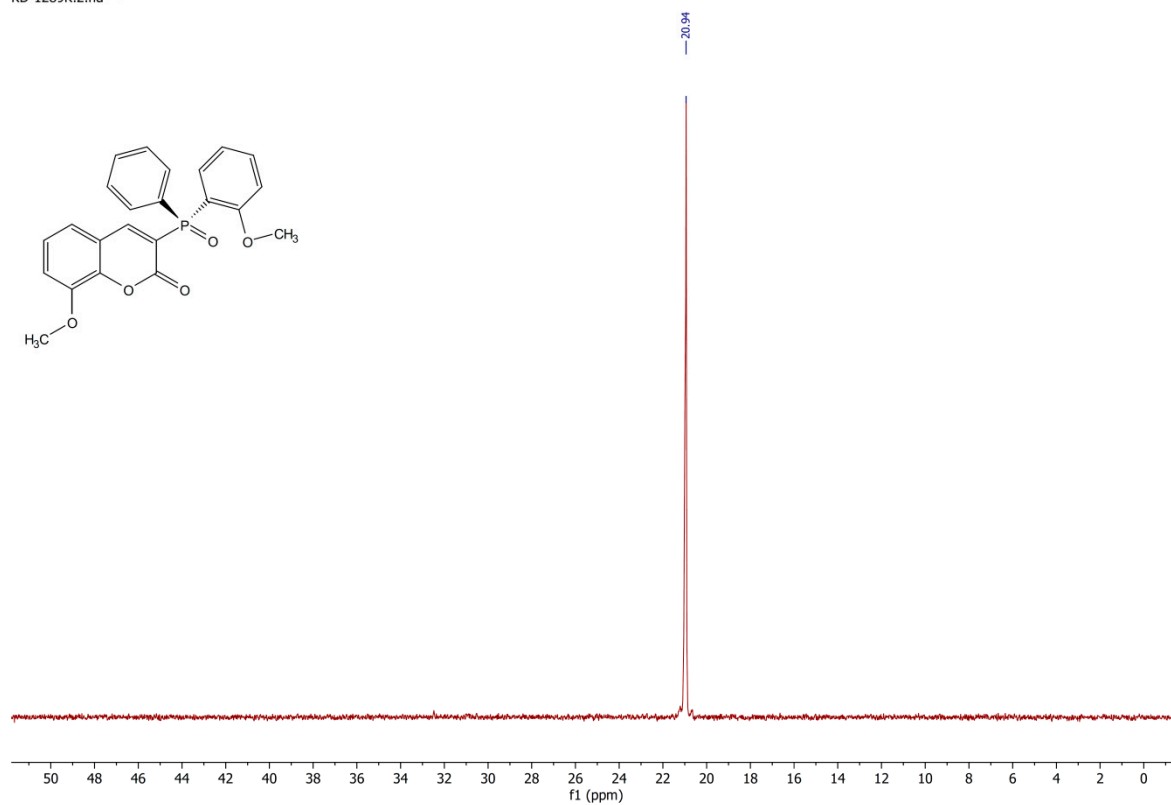

**Figure S-13.** <sup>1</sup>H NMR (500 MHz), <sup>13</sup>C NMR (126 MHz) and <sup>31</sup>P NMR (202 MHz) of 3-(*S*)-(2-Methoxyphenyl)phenylphosphinyl)-8-methoxy-2*H*-chromen-2-one (**4d**) in CDCl<sub>3</sub>.

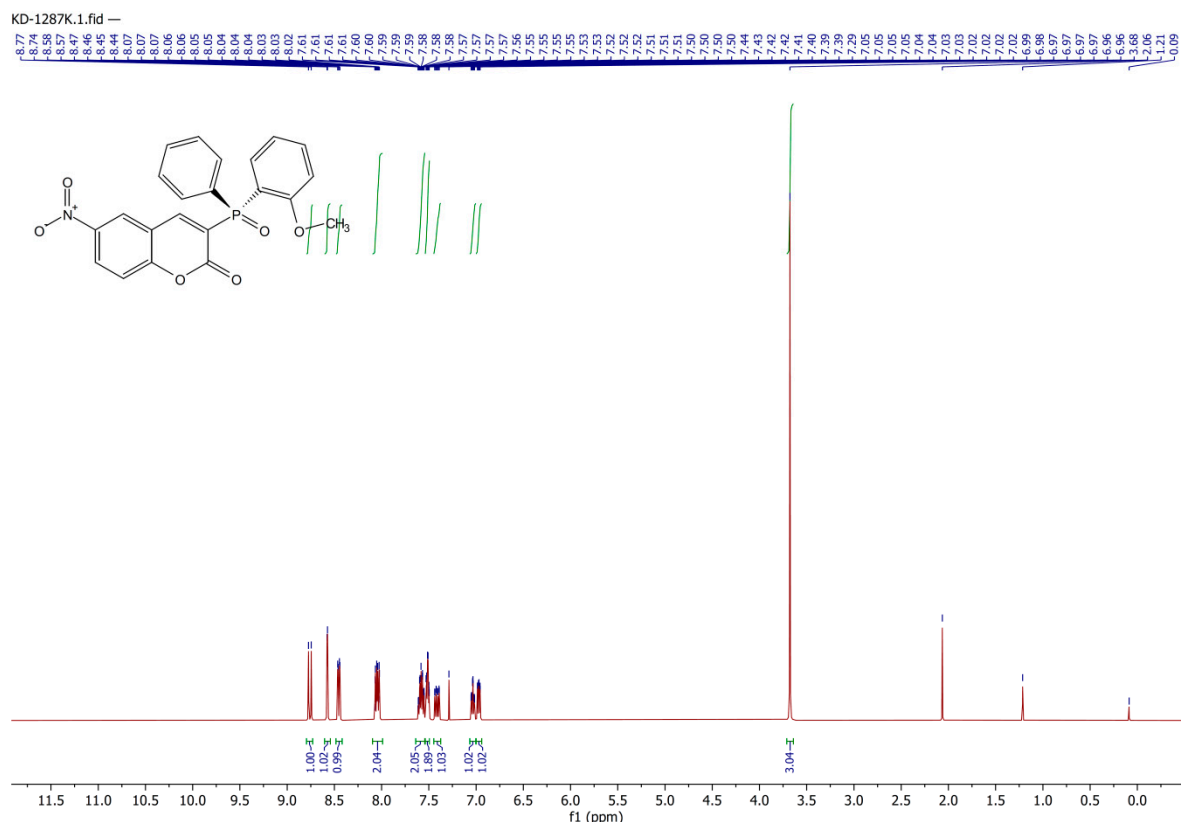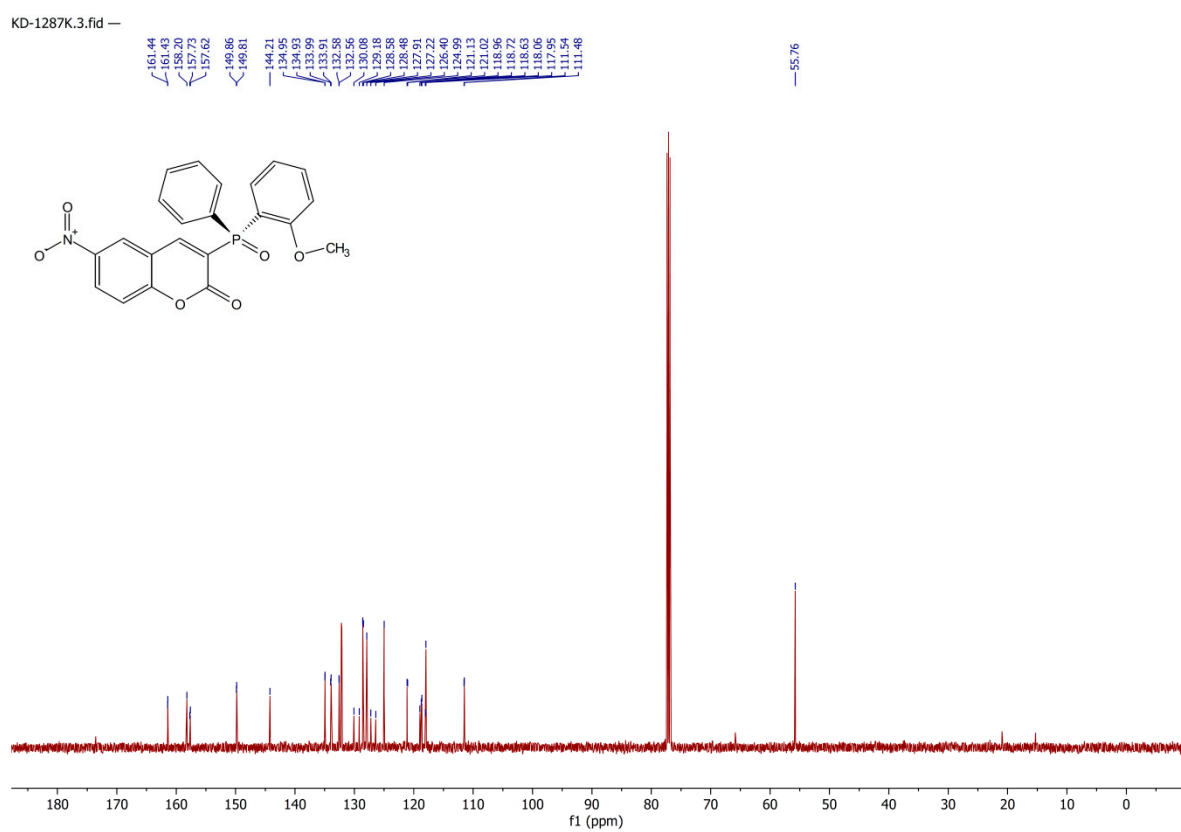

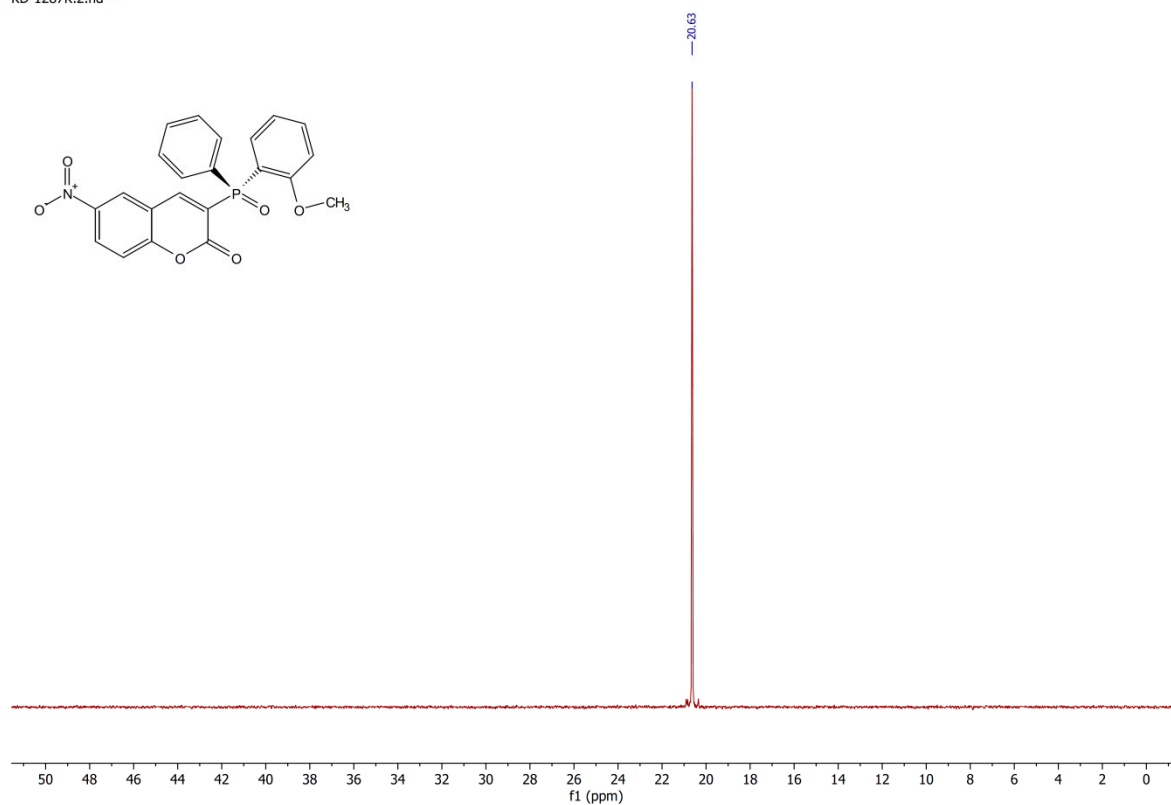

**Figure S-14.** <sup>1</sup>H NMR (500 MHz), <sup>13</sup>C NMR (126 MHz) and <sup>31</sup>P NMR (202 MHz) of 3-(*S*<sub>P</sub>)-(2-Methoxyphenyl)phenylphosphinyl)-6-nitro-2*H*-chromen-2-one (**4f**) in CDCl<sub>3</sub>.

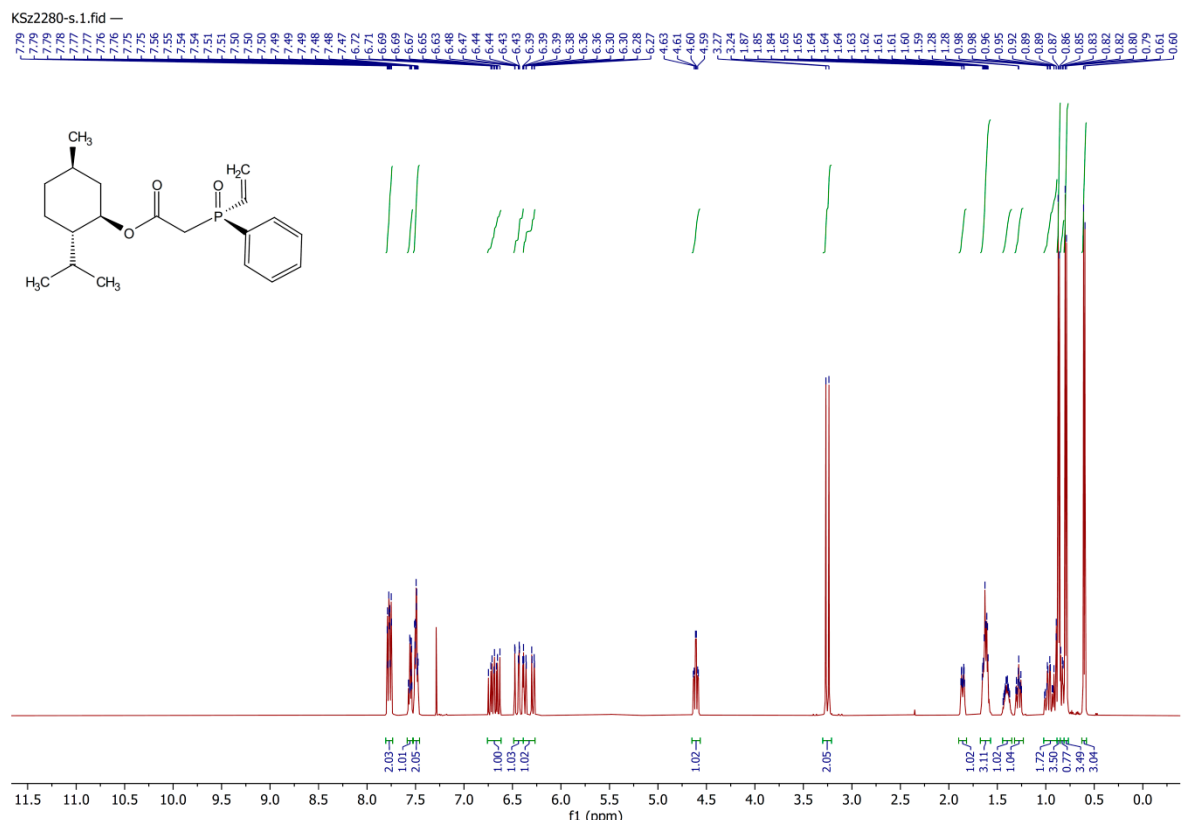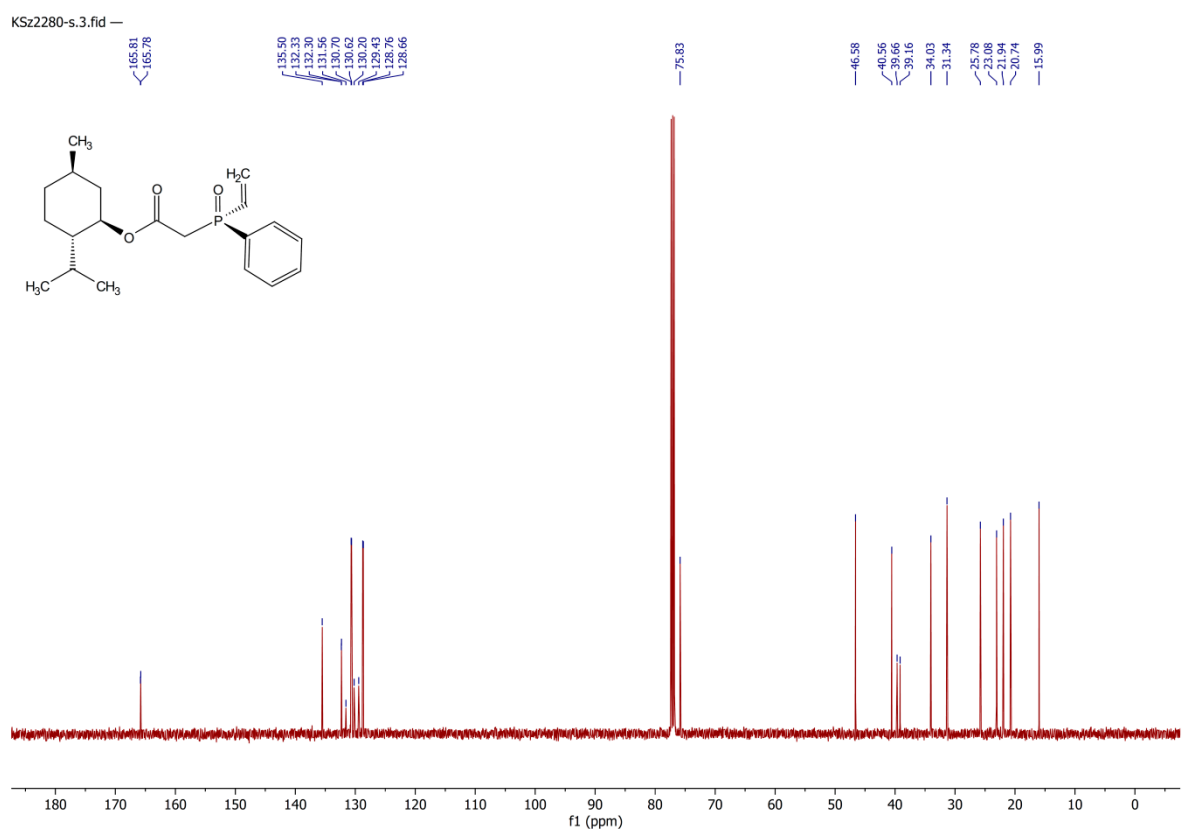



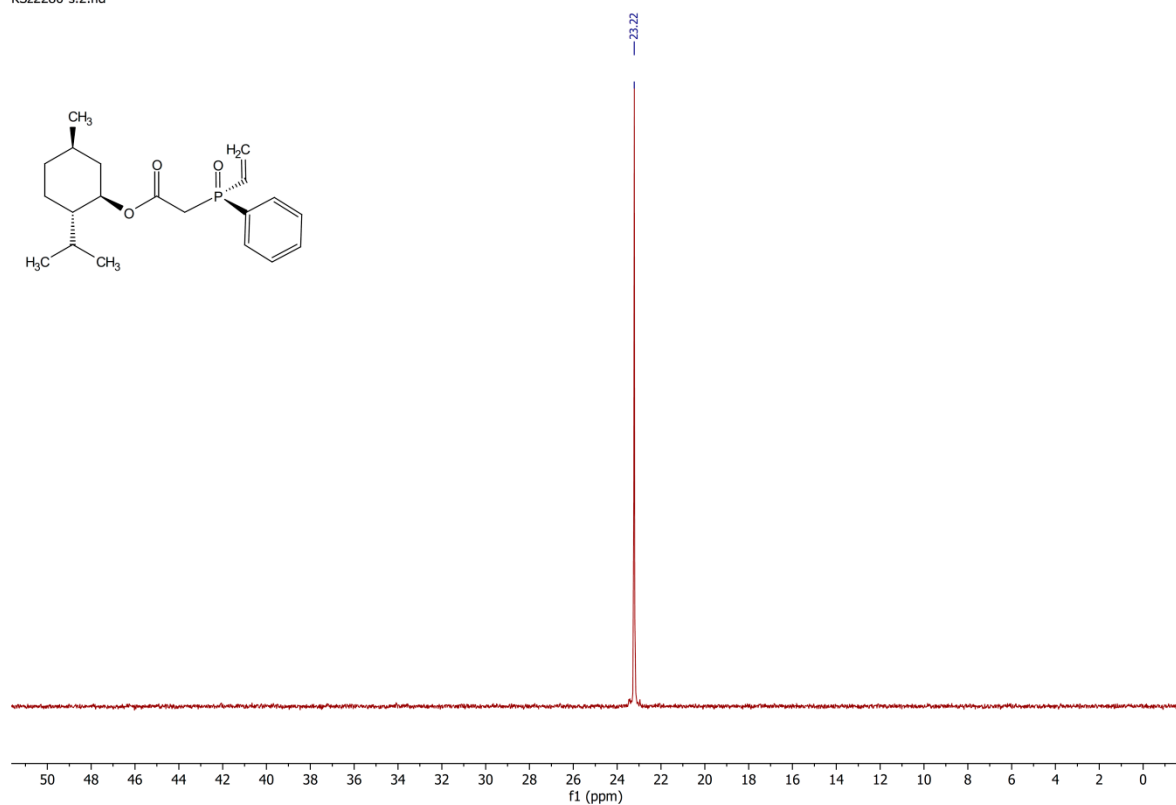

**Figure S-15.** <sup>1</sup>H NMR (500 MHz), <sup>13</sup>C NMR (126 MHz) and <sup>31</sup>P NMR (202 MHz) of (*S*)-*L*-menthyl phenylvinylphosphinyllacetate (**5**) in CDCl<sub>3</sub>.

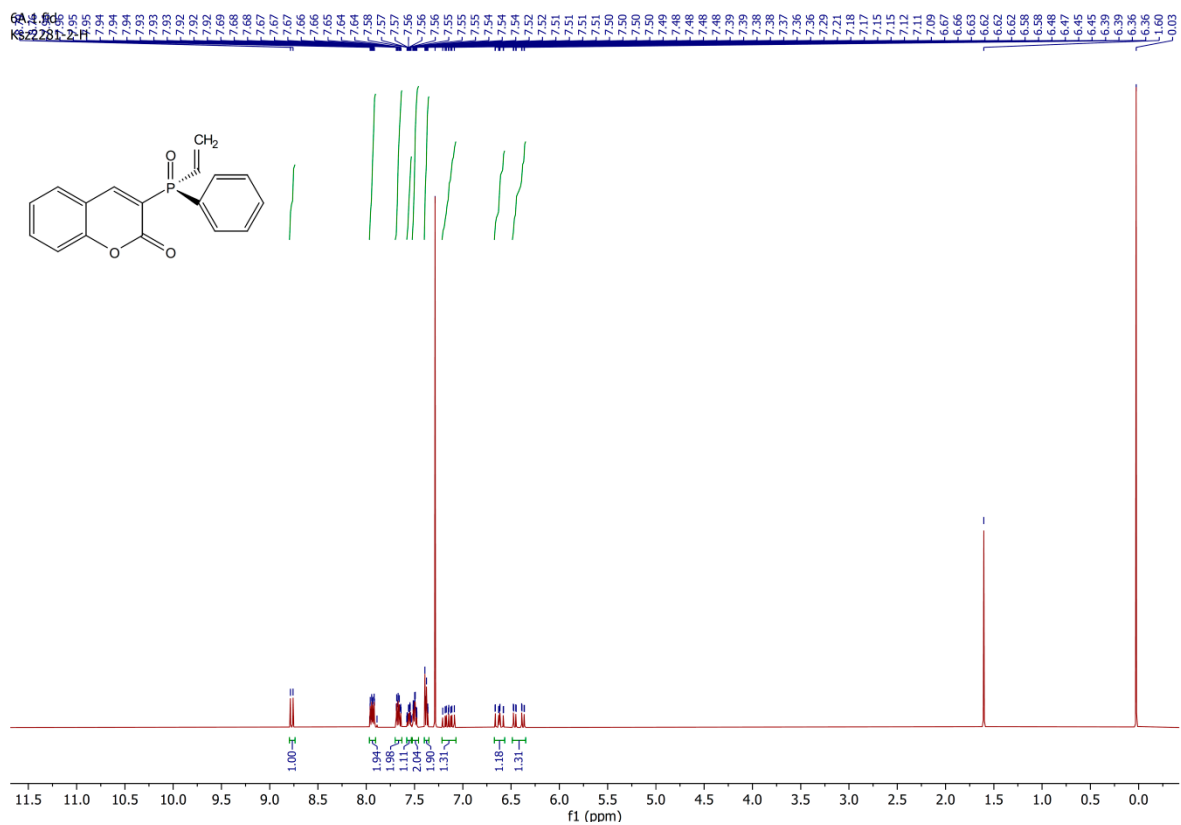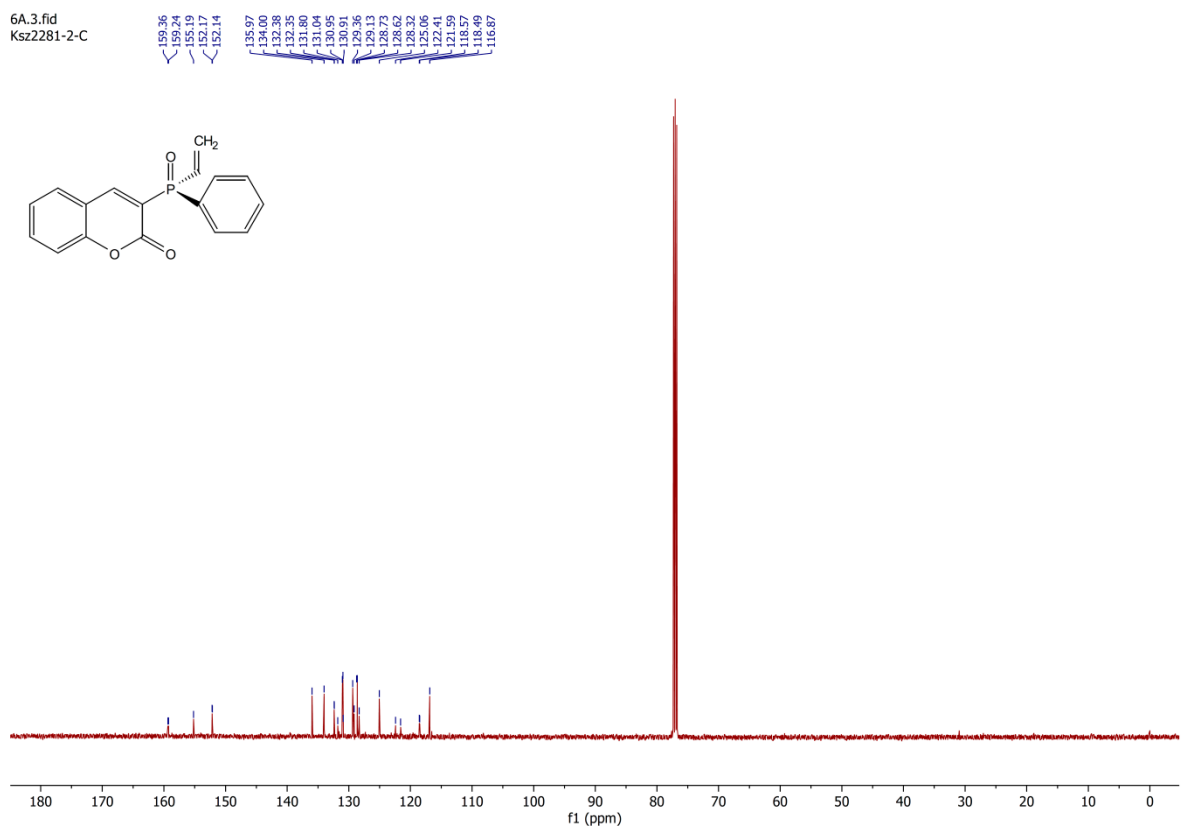

6A.2.fid  
Ksz2281-2-P

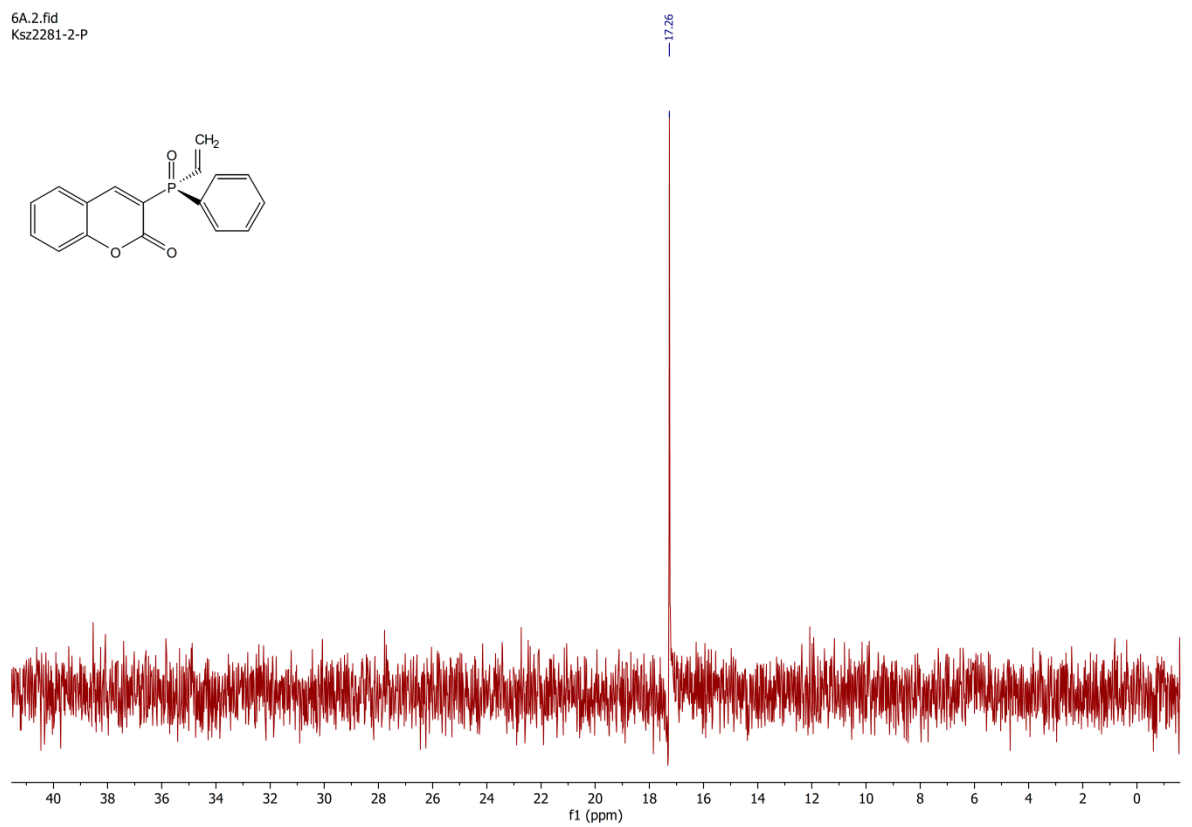

**Figure S-16.**  $^1\text{H}$  NMR (500 MHz),  $^{13}\text{C}$  NMR (126 MHz) and  $^{31}\text{P}$  NMR (202 MHz) of 3-(*S*<sub>P</sub>)-(Phenyl(vinyl)phosphiny)-2H-chromen-2-one (**6a**) in  $\text{CDCl}_3$ .

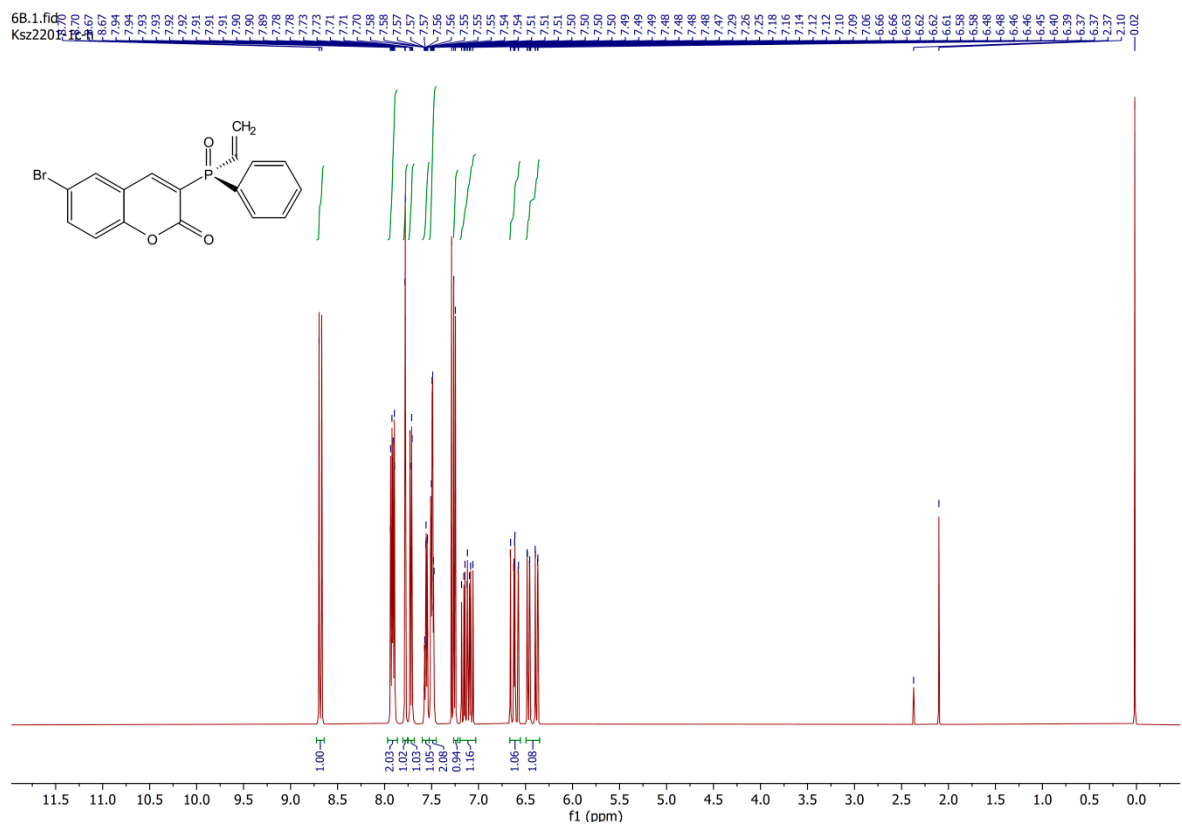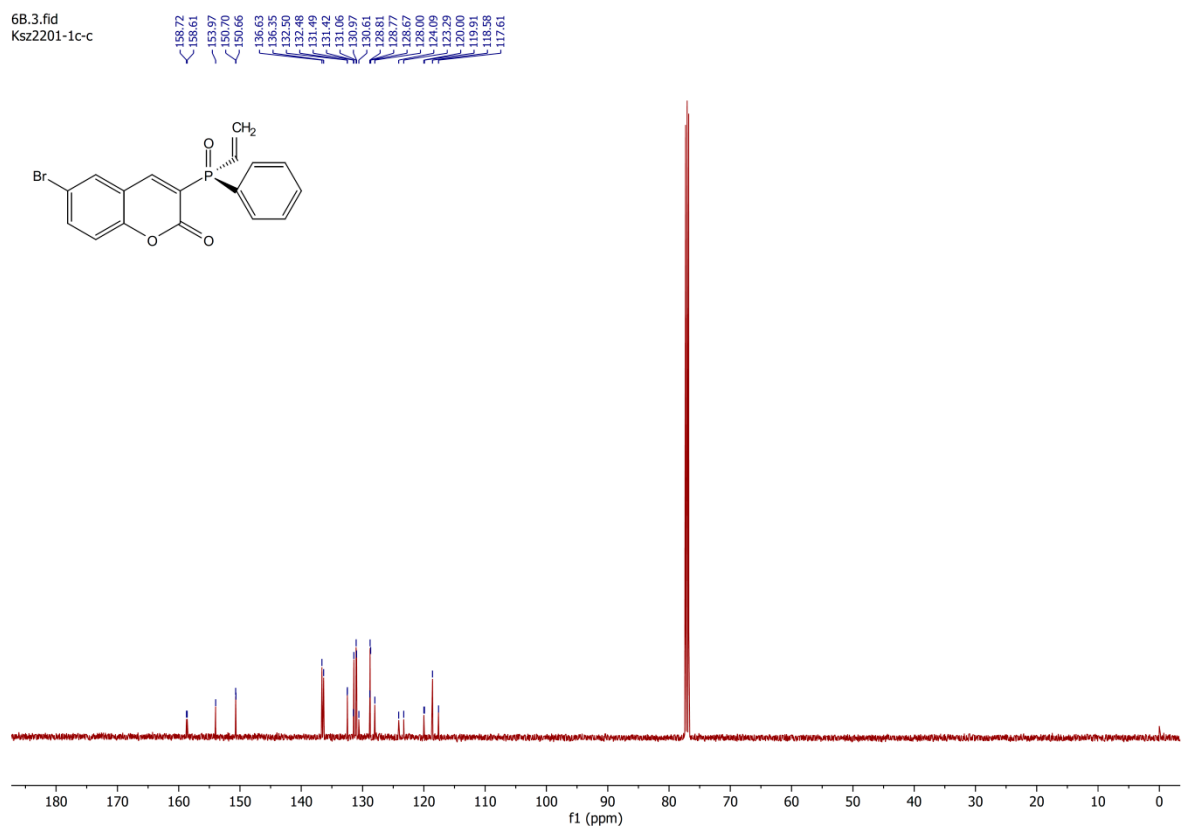

6B.2.fid  
Ksz2201-1c-P

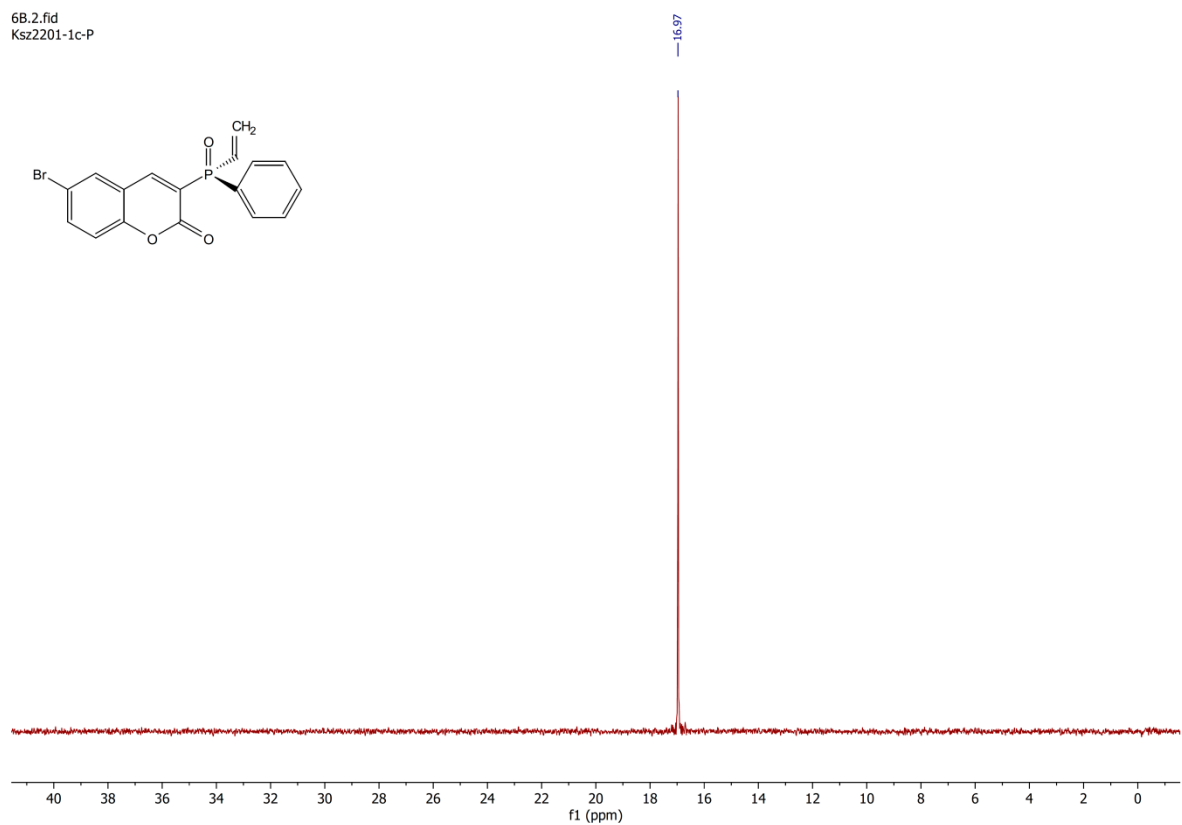

**Figure S-17.** <sup>1</sup>H NMR (500 MHz), <sup>13</sup>C NMR (126 MHz) and <sup>31</sup>P NMR (202 MHz) of 6-(Bromo)-3-(*S<sub>P</sub>*)-(phenyl(vinyl)phosphinyl)-2*H*-chromen-2-one (**6b**) in CDCl<sub>3</sub>.



6C.2.fid  
Ksz2280-1-2c-P

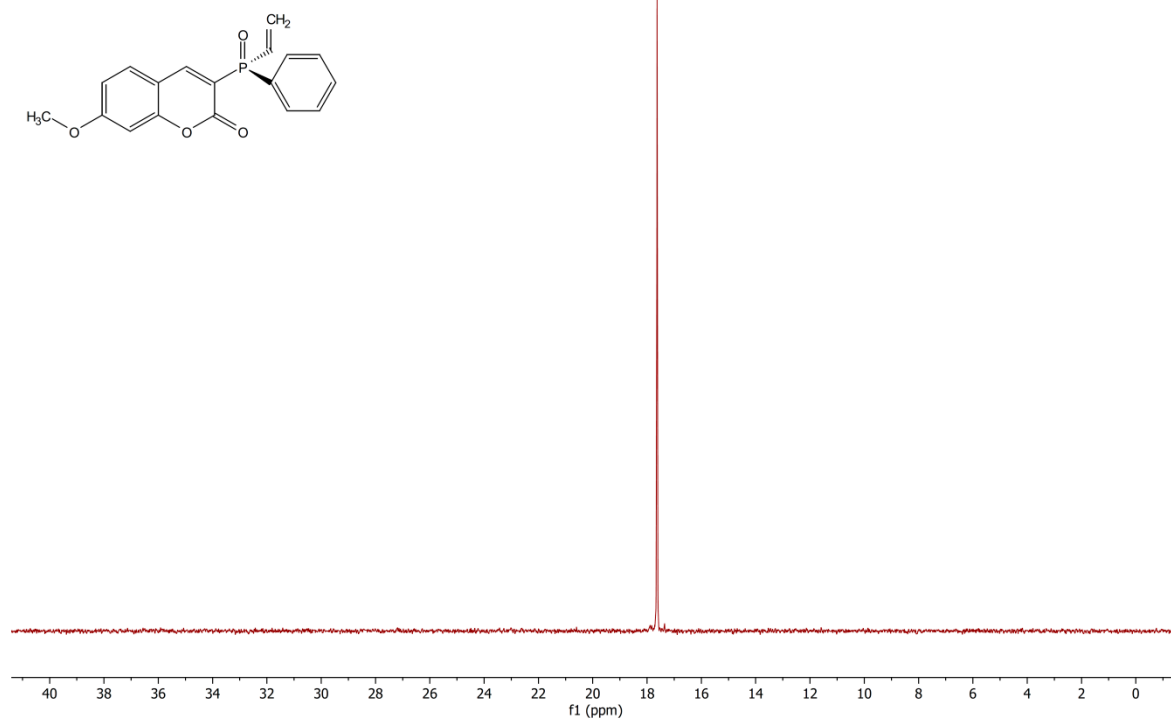

**Figure S-18.** <sup>1</sup>H NMR (500 MHz), <sup>13</sup>C NMR (126 MHz) and <sup>31</sup>P NMR (202 MHz) of 3-(*S*)-(Phenyl(vinyl)phosphinyl)-7-methoxy-2*H*-chromen-2-one (**6c**) in CDCl<sub>3</sub>.

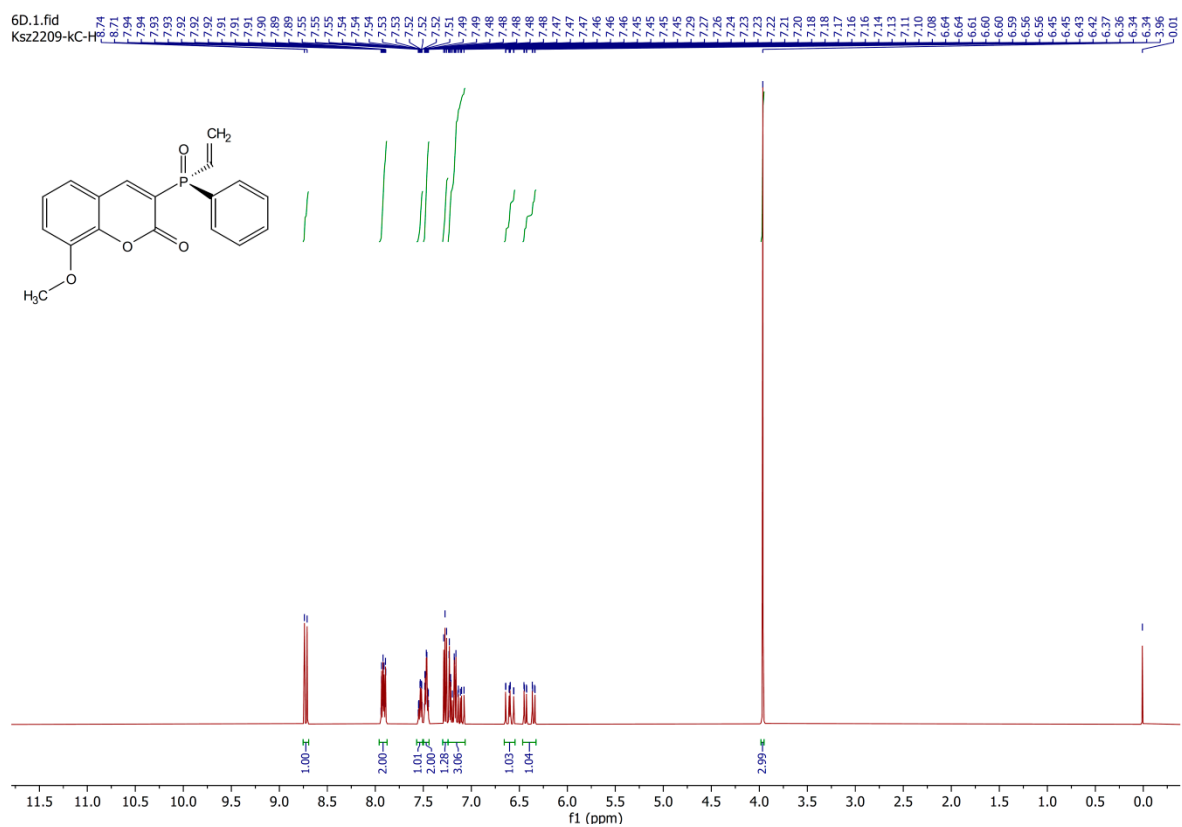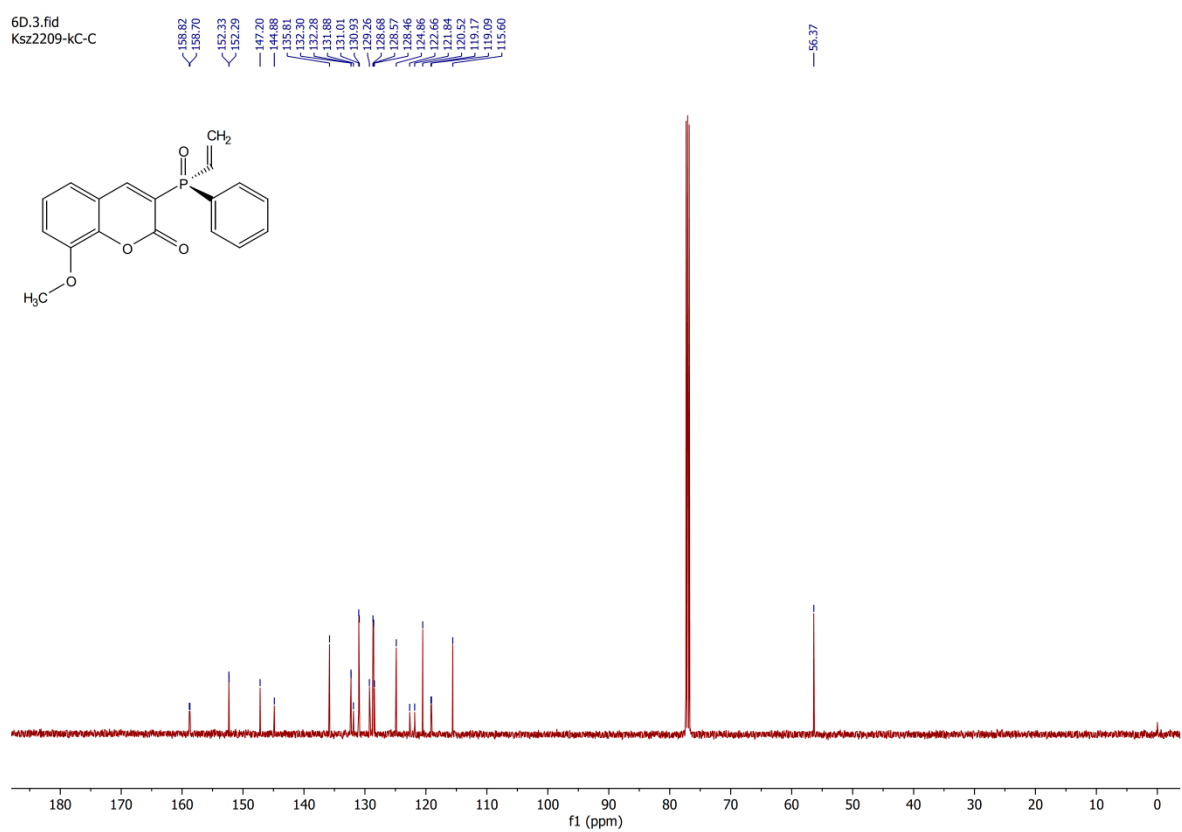



6D.2.fid  
Ksz2209-kC-P

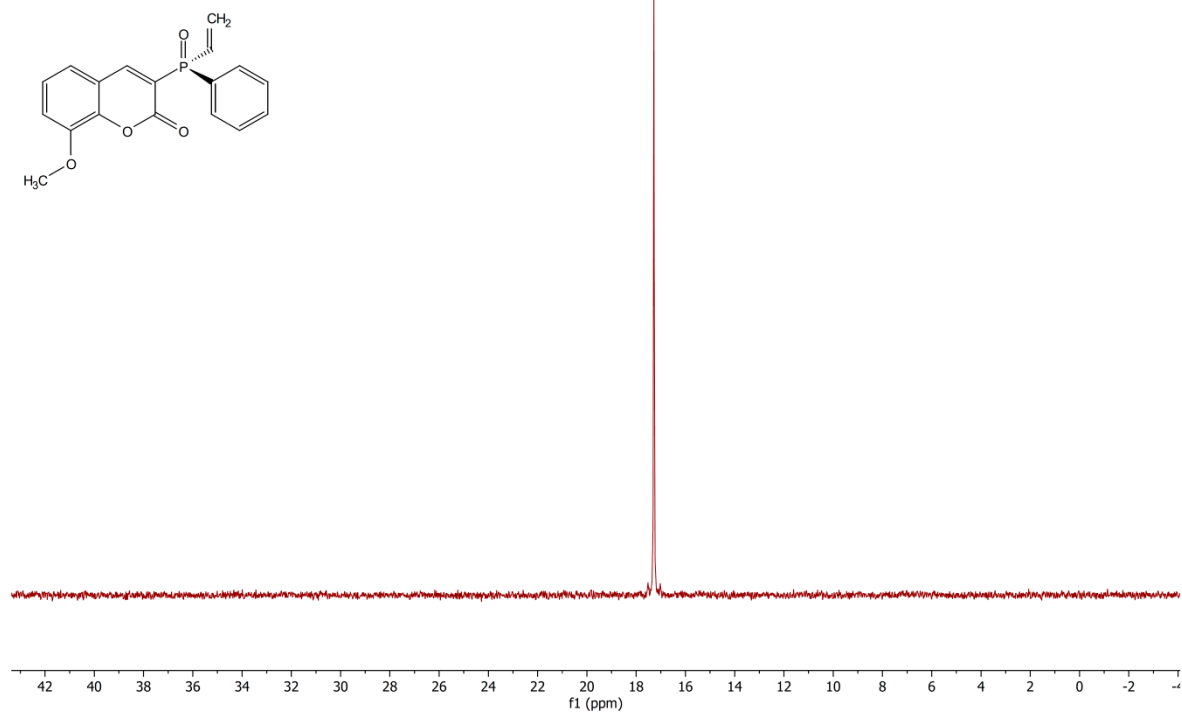

**Figure S-19.** <sup>1</sup>H NMR (500 MHz), <sup>13</sup>C NMR (126 MHz) and <sup>31</sup>P NMR (202 MHz) of 3-(*S*)-(Phenyl(vinyl)phosphinyl)-8-methoxy-2*H*-chromen-2-one (**6d**) in CDCl<sub>3</sub>.

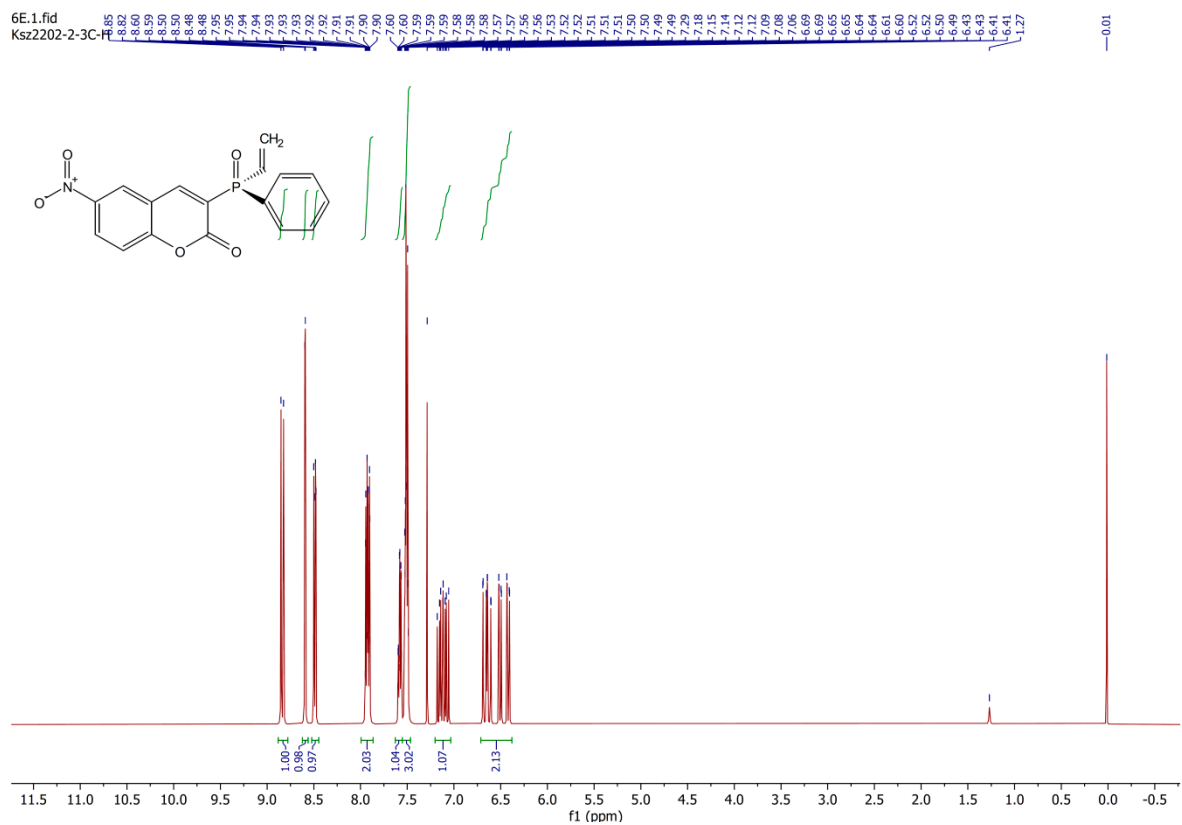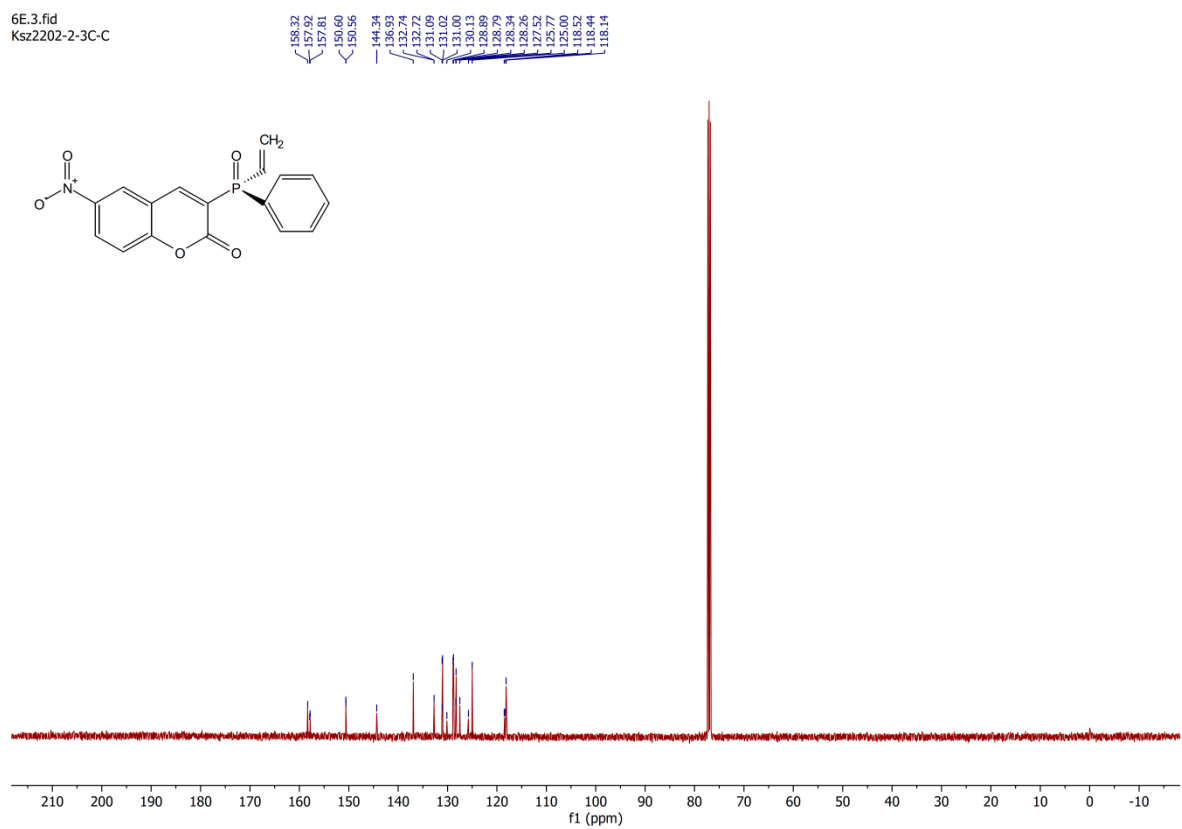

6E.2.fid  
Ksz2202-2-3C-P

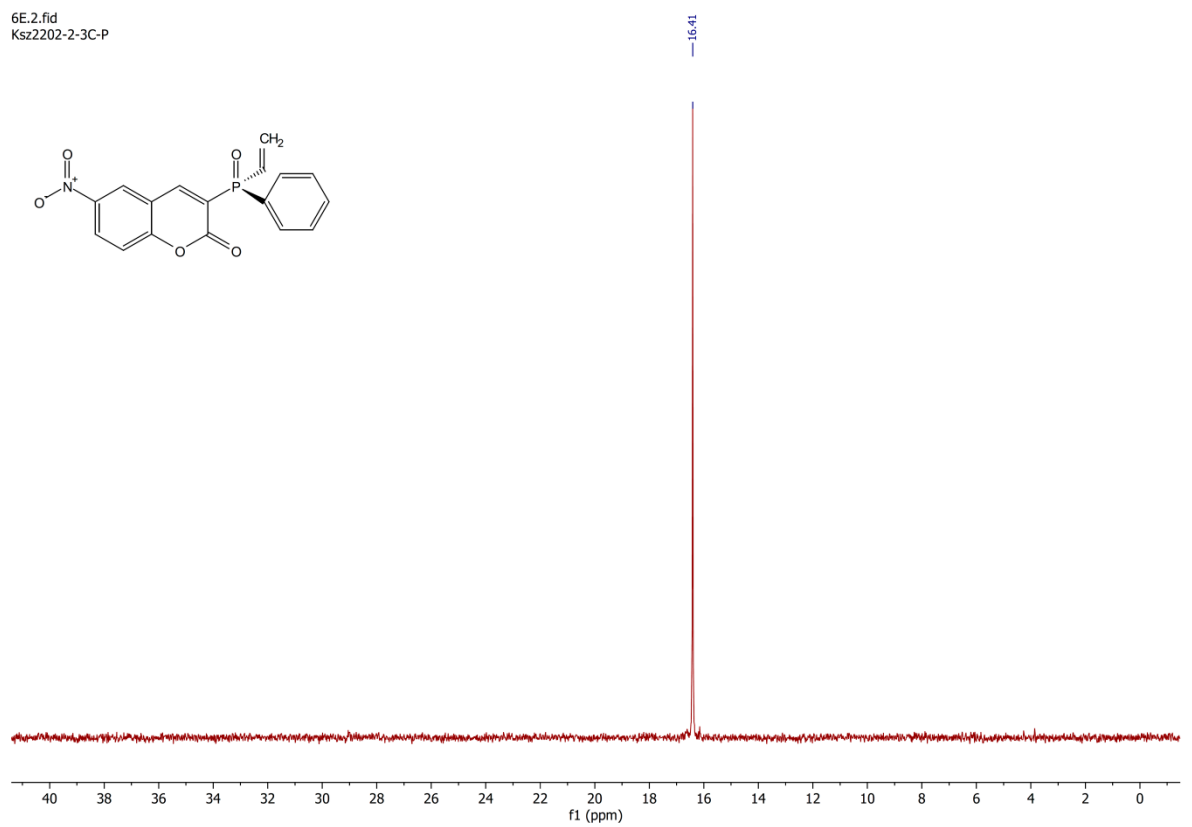

**Figure S-20.** <sup>1</sup>H NMR (500 MHz), <sup>13</sup>C NMR (126 MHz) and <sup>31</sup>P NMR (202 MHz) of 3-(*S<sub>P</sub>*)-(Phenyl(vinyl)phosphinyl)-6-nitro-2H-chromen-2-one (**6e**) in CDCl<sub>3</sub>.



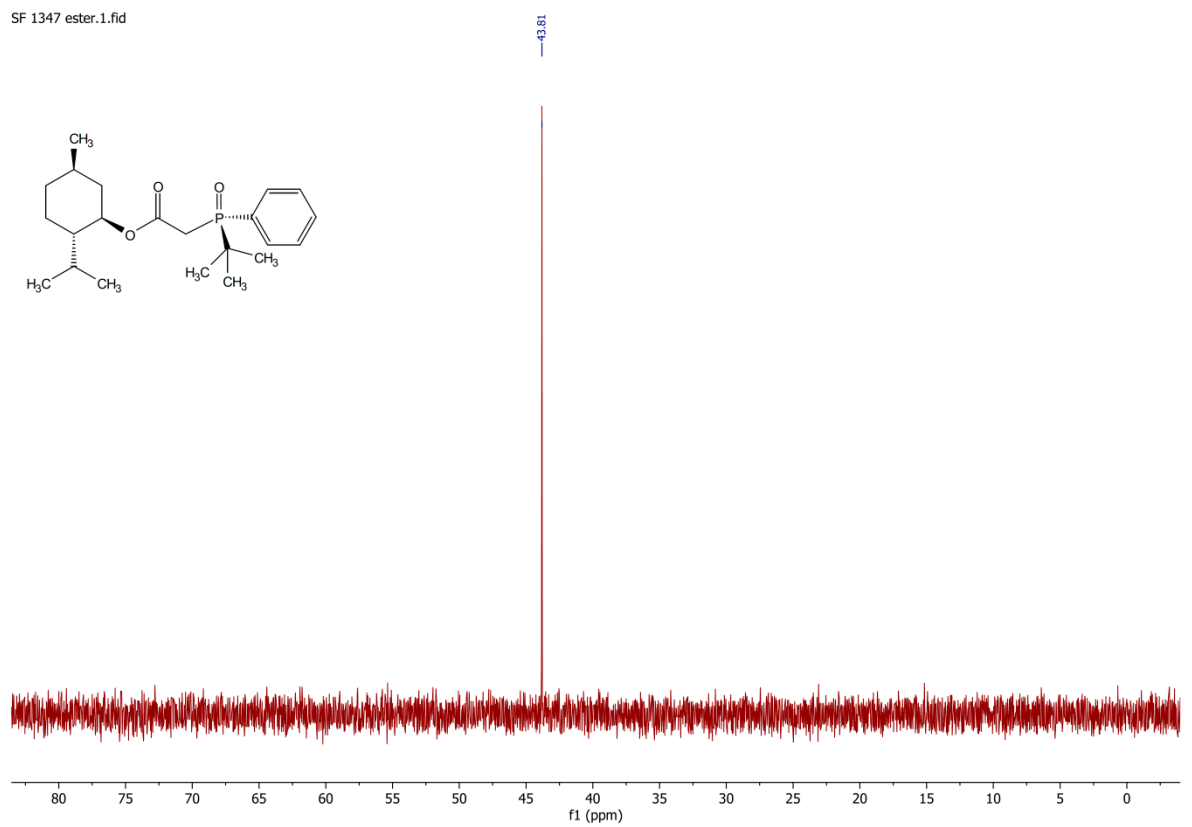

**Figure S-20.** <sup>1</sup>H NMR (500 MHz), <sup>13</sup>C NMR (126 MHz) and <sup>31</sup>P NMR (202 MHz) of *(R\_P)*-tert-butylphenylphosphinyl acetic acid menthyl ester (7) in CDCl<sub>3</sub>.

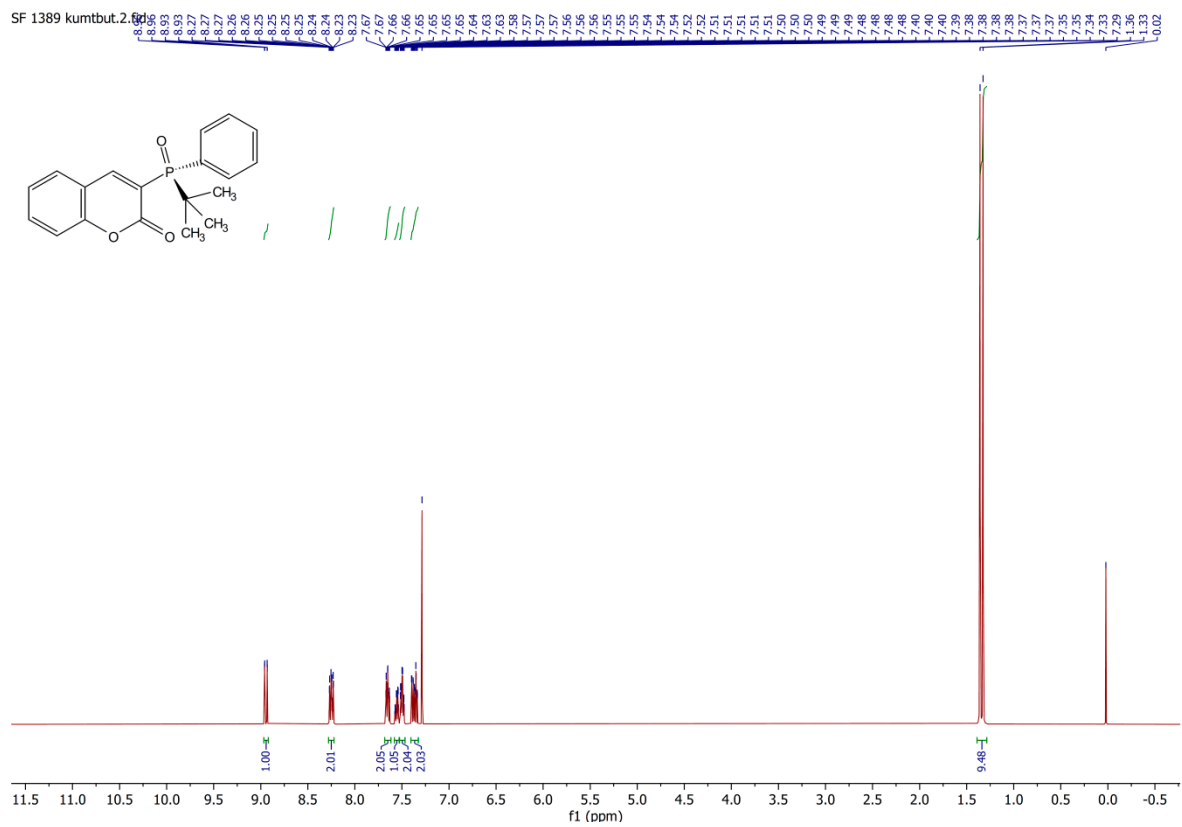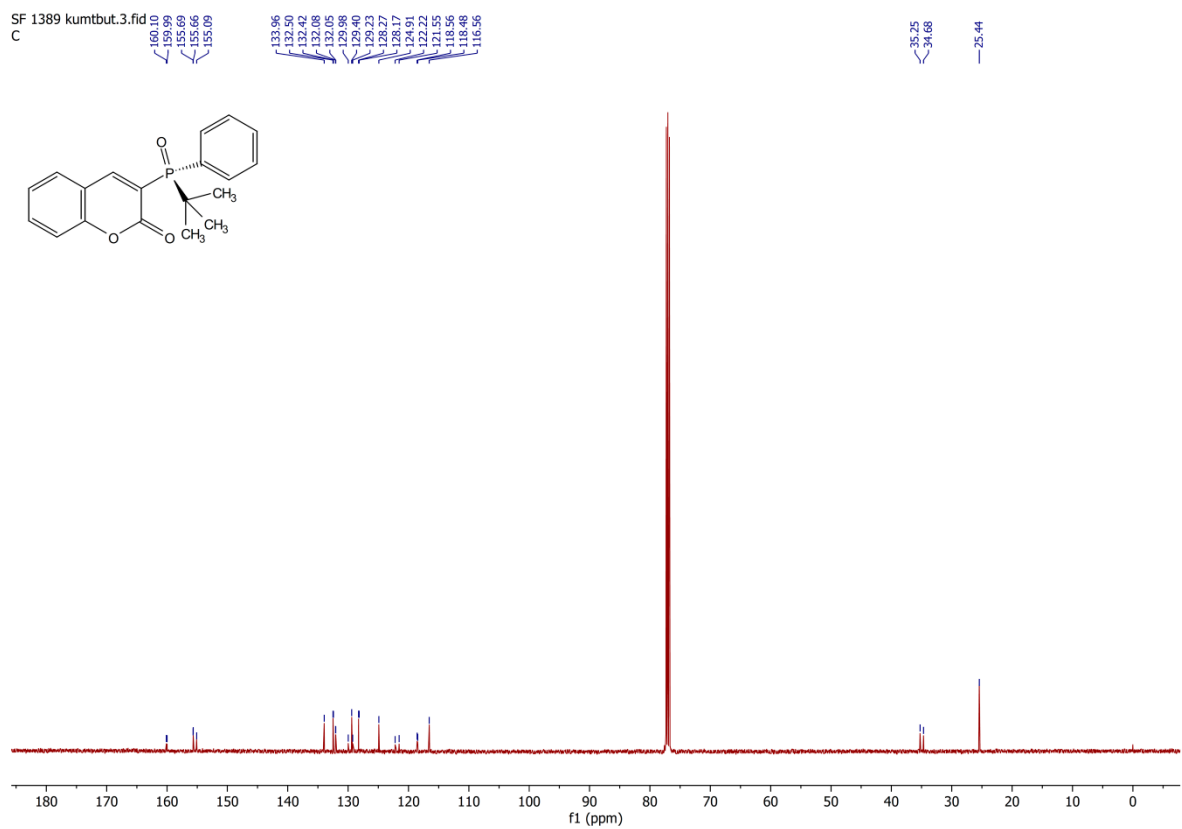

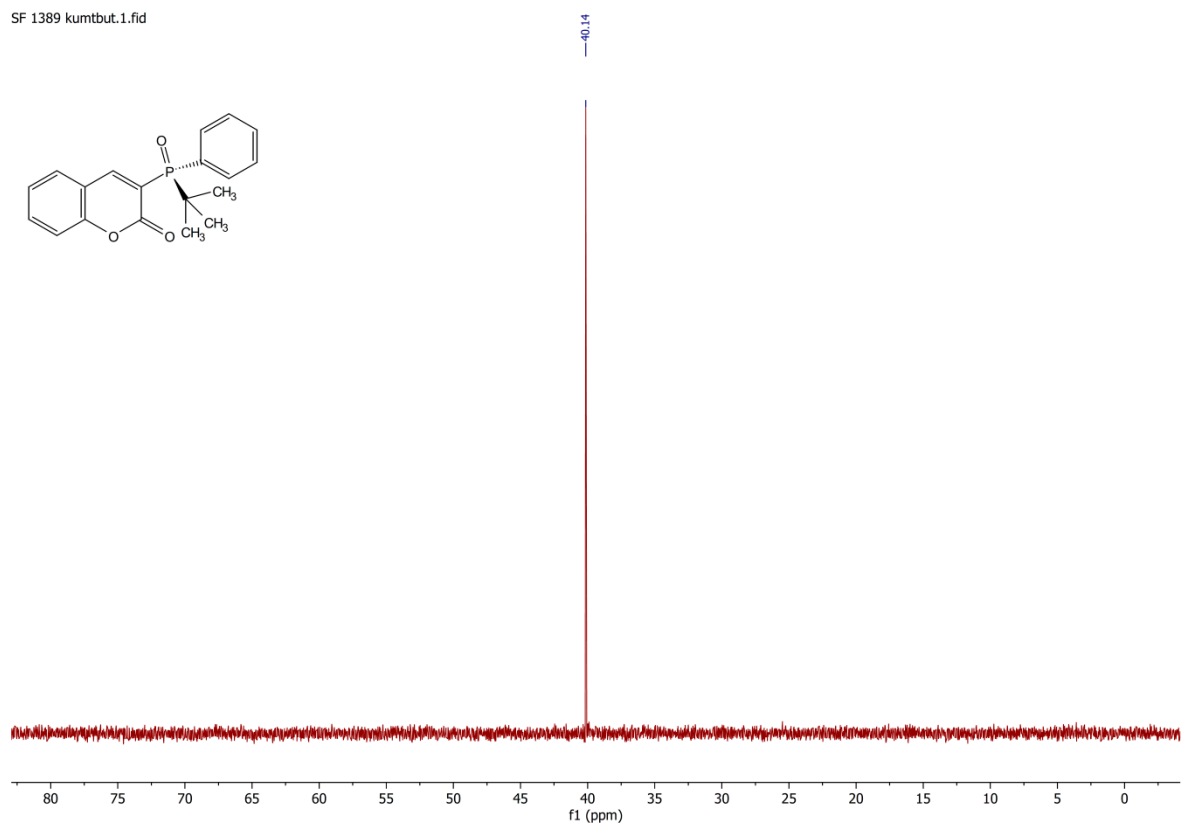

**Figure S-21.** <sup>1</sup>H NMR (500 MHz), <sup>13</sup>C NMR (126 MHz) and <sup>31</sup>P NMR (202 MHz) of 3-(*R*)-(*t*-butylphenylphosphinyl)-2H-chromen-2-one (**8a**) in CDCl<sub>3</sub>.

## 2. The single-crystal-diffraction data

Table S1 presents all molecules for which the crystal structure has been determined, viz. **2d**, **2e**, **4a**, **4d**, **5**, **6d**, and **6e**. Some compounds crystallize with more than one molecule in the symmetrically independent part. In the crystals of compounds **6d** and **6e**, the unit cells contain two conformers, while for **4d** they contain four. In this way, thanks to the possibility of rotation of the substituents around the P-C bonds, the energy minimum of the crystal lattice is achieved.

|    |                                                                                      |                                                                     |
|----|--------------------------------------------------------------------------------------|---------------------------------------------------------------------|
| 2d | 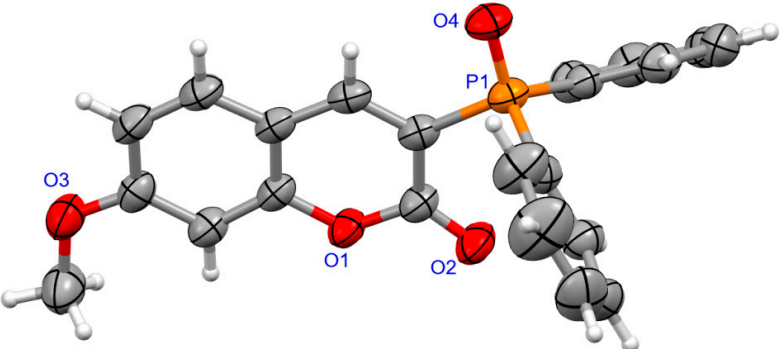   | 3-(diphenylphosphinyl)-7-methoxy-2H-chromen-2-one                   |
| 2e |   | 3-(diphenylphosphinyl)-8-methoxy-2H-chromen-2-one                   |
| 4a |  | 3-( <i>Sp</i> )-(2-methoxyphenyl)phenylphosphinyl)-2H-chromen-2-one |



|                           |                                                                                      |                                                                                        |
|---------------------------|--------------------------------------------------------------------------------------|----------------------------------------------------------------------------------------|
| 4d<br>mole-<br>-cule<br>A | 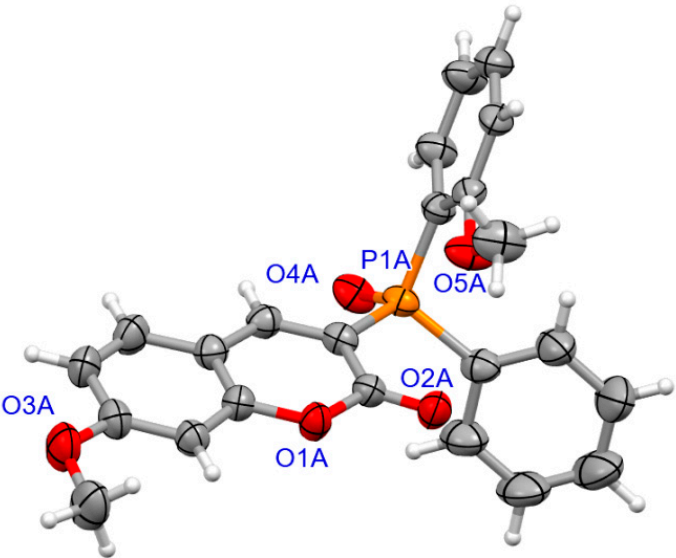    | 3-( <i>S</i> )-((2-methoxyphenyl)phenylphosphinyl)-7-methoxy-2 <i>H</i> -chromen-2-one |
| 4d<br>mole-<br>-cule<br>B |    |                                                                                        |
| 4d<br>mole-<br>-cule<br>C |  |                                                                                        |
| 4d<br>mole-<br>-cule<br>D |   |                                                                                        |

|    |                                                                                      |                                                                                              |
|----|--------------------------------------------------------------------------------------|----------------------------------------------------------------------------------------------|
| 5  | 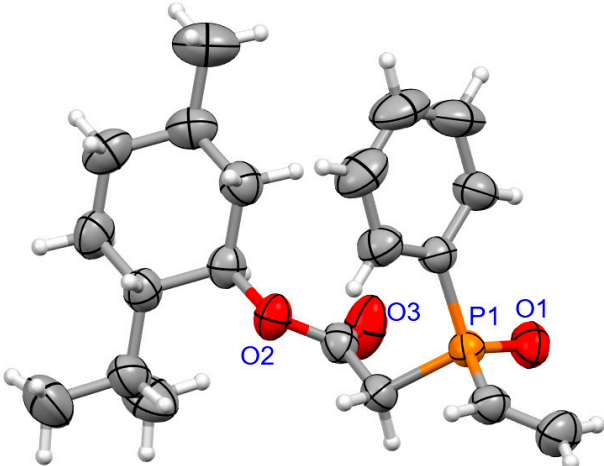    | ( <i>S</i> )-L-menthyl<br>phenylvinylphosphinyldiacetate                                     |
| 6d |    | 3-( <i>S</i> )-<br>(phenyl(vinyl)<br>phosphinyl)-8-<br>methoxy-2 <i>H</i> -<br>chromen-2-one |
| 6d |  |                                                                                              |

|                     |                                                                                     |                                                                                                        |
|---------------------|-------------------------------------------------------------------------------------|--------------------------------------------------------------------------------------------------------|
| 6e                  |                                                                                     |                                                                                                        |
| mole-<br>-cule<br>A | 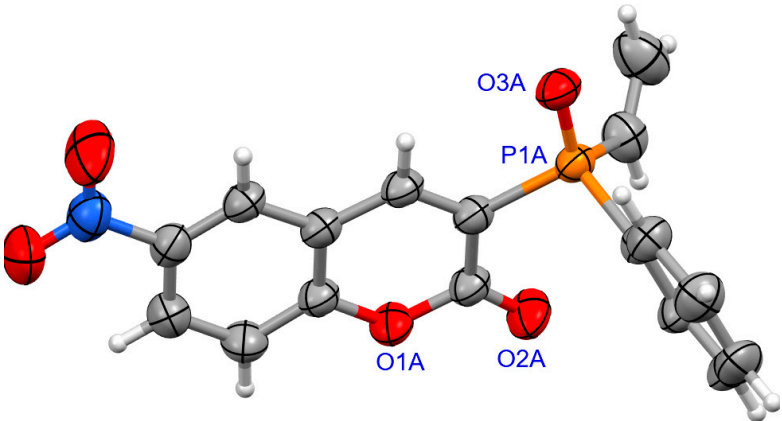  | 3-( <i>S<sub>P</sub></i> )-<br>(phenyl(vinyl)<br>phosphinyl)-6-<br>nitro-2 <i>H</i> -<br>chromen-2-one |
| 6e                  |                                                                                     |                                                                                                        |
| mole-<br>-cule<br>B |  |                                                                                                        |

Table S1. Illustration of molecular conformers observed in crystals. The drawings were prepared using the ORTEP program; the thermal ellipsoids are shown with a probability of 50%.
